# Supplementary material for: Novel phthalide derivatives from the rhizomes of Ligusticum chuanxiong and their inhibitory effect against lipopolysaccharide-induced nitric oxide production in RAW 264.7 macrophage cells
Source: Royal Society of Chemistry journal article supplement (doi:10.1039/c6ra10023f), 2016-01-01
Supplement: c6ra10023f1.pdf [file c6ra10023f1.pdf]

## Electronic Supplementary Information

### **Novel phthalide derivatives from the rhizomes of *Ligusticum chuanxiong* and their inhibitory effect against lipopolysaccharide-induced nitric oxide production in RAW 264.7 macrophage cells**

Wei Wei, Xiu-Wen Wu, Xiu-Wei Yang\*

State Key Laboratory of Natural and Biomimetic Drugs (Peking University),

Department of Natural Medicines, School of Pharmaceutical Sciences, Peking

University Health Science Center, Peking University, Beijing 100191, PR China.

\*Corresponding author at: No. 38, Xueyuan Road, Haidian District, Beijing, 100191,

PR China. Tel.: 86 10 82801569; fax: +86 10 82802724. E-mail address:

xwyang@bjmu.edu.cn (X. W. Yang).

### **Contents**

Figure S 1. HRESIMS data of **1**

Figure S 1. IR spectrum of **1**

Figure S 2. UV spectrum of **1** in MeOH

Figure S 3. <sup>1</sup>H NMR spectrum of **1** in CDCl<sub>3</sub>

Figure S 5. <sup>13</sup>C NMR spectrum of **1** in CDCl<sub>3</sub>

Figure S 6. DEPT spectrum of **1** in CDCl<sub>3</sub>

Figure S 7. <sup>1</sup>H-<sup>1</sup>H COSY spectrum of **1** in CDCl<sub>3</sub>

Figure S 8. HSQC spectrum of **1** in CDCl<sub>3</sub>

Figure S 9. HMBC spectrum of **1** in CDCl<sub>3</sub>

Figure S 10. NOESY spectrum of **1** in CDCl<sub>3</sub>

Figure S 11. HRESIMS data of **2**

Figure S 14. IR spectrum of **2**

Figure S 15. UV spectrum of **2** in MeOH

Figure S 16.  $^1\text{H}$  NMR spectrum of **1** in  $\text{CDCl}_3$

Figure S 15.  $^{13}\text{C}$  NMR spectrum of **2** in  $\text{CDCl}_3$

Figure S 16. DEPT spectrum of **2** in  $\text{CDCl}_3$

Figure S 17.  $^1\text{H}$ - $^1\text{H}$  COSY spectrum of **2** in  $\text{CDCl}_3$

Figure S 18. HSQC spectrum of **2** in  $\text{CDCl}_3$

Figure S 19. HMBC spectrum of **2** in  $\text{CDCl}_3$

Figure S 20. NOESY spectrum of **2** in  $\text{CDCl}_3$

Figure S 21. HRESIMS data of **3**

Figure S 27. IR spectrum of **3**

Figure S 28. UV spectrum of **3** in MeOH

Figure S 29.  $^1\text{H}$  NMR spectrum of **3** in  $\text{CDCl}_3$

Figure S 25.  $^{13}\text{C}$  NMR spectrum of **3** in  $\text{CDCl}_3$

Figure S 26. DEPT spectrum of **3** in  $\text{CDCl}_3$

Figure S 27.  $^1\text{H}$ - $^1\text{H}$  COSY spectrum of **3** in  $\text{CDCl}_3$

Figure S 28. HSQC spectrum of **3** in  $\text{CDCl}_3$

Figure S 29. HMBC spectrum of **3** in  $\text{CDCl}_3$

Figure S 30. NOESY spectrum of **3** in  $\text{CDCl}_3$

Figure S 31. HRESIMS data of **4**

Figure S 310. IR spectrum of **4**

Figure S 311. UV spectrum of **4** in MeOH

Figure S 312.  $^1\text{H}$  NMR spectrum of **4** in  $\text{CDCl}_3$

Figure S 35.  $^{13}\text{C}$  NMR spectrum of **4** in  $\text{CDCl}_3$

Figure S 36. DEPT spectrum of **4** in  $\text{CDCl}_3$

Figure S 37.  $^1\text{H}$ - $^1\text{H}$  COSY spectrum of **4** in  $\text{CDCl}_3$

Figure S 38. HSQC spectrum of **4** in  $\text{CDCl}_3$

Figure S 39. HMBC spectrum of **4** in  $\text{CDCl}_3$

Figure S 40. NOESY spectrum of **4** in  $\text{CDCl}_3$

Figure S 41. HRESIMS data of **5**

Figure S 413. IR spectrum of **5**

Figure S 414. UV spectrum of **5** in MeOH

Figure S 415.  $^1\text{H}$  NMR spectrum of **5** in  $\text{CDCl}_3$

Figure S 45.  $^{13}\text{C}$  NMR spectrum of **5** in  $\text{CDCl}_3$

Figure S 46. DEPT spectrum of **5** in  $\text{CDCl}_3$

Figure S 47.  $^1\text{H}$ - $^1\text{H}$  COSY spectrum of **5** in  $\text{CDCl}_3$

Figure S 48. HSQC spectrum of **5** in  $\text{CDCl}_3$

Figure S 49. HMBC spectrum of **5** in  $\text{CDCl}_3$

Figure S 50. NOESY spectrum of **5** in  $\text{CDCl}_3$

## Elemental Composition Report

### Single Mass Analysis

Tolerance = 2.0 PPM / DBE: min = -1.5, max = 50.0  
 Element prediction: Off  
 Number of isotope peaks used for i-FIT = 3

Monoisotopic Mass, Even Electron Ions

752 formula(e) evaluated with 2 results within limits (up to 50 closest results for each mass)

Elements Used:

C: 0-100 H: 0-200 N: 0-5 O: 0-30 Si: 0-1

Xevo G2 Q-TOF/YCA166#

15-May-2015

20150508-12 12 (0.220) Cm (10:18-(1:5+27:56))

Waters  
 TOF MS ES+  
 7.92e+007

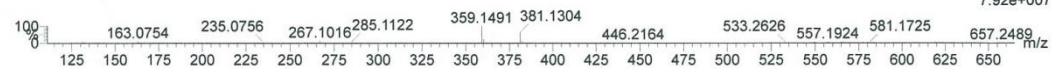

Minimum: -1.5  
 Maximum: 5.0 2.0 50.0

| Mass     | Calc. Mass | mDa  | PPM  | DBE | i-FIT  | Norm   | Conf(%) | Formula          |
|----------|------------|------|------|-----|--------|--------|---------|------------------|
| 359.1491 | 359.1495   | -0.4 | -1.1 | 9.5 | 1011.4 | 0.000  | 100.00  | C20 H23 O6       |
|          | 359.1486   | 0.5  | 1.4  | 0.5 | 1027.5 | 16.096 | 0.00    | C11 H27 N2 O9 Si |

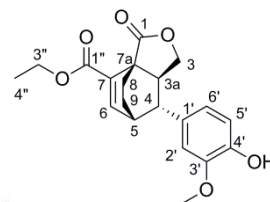

Page 1

Figure S 16. HRESIMS data of 1

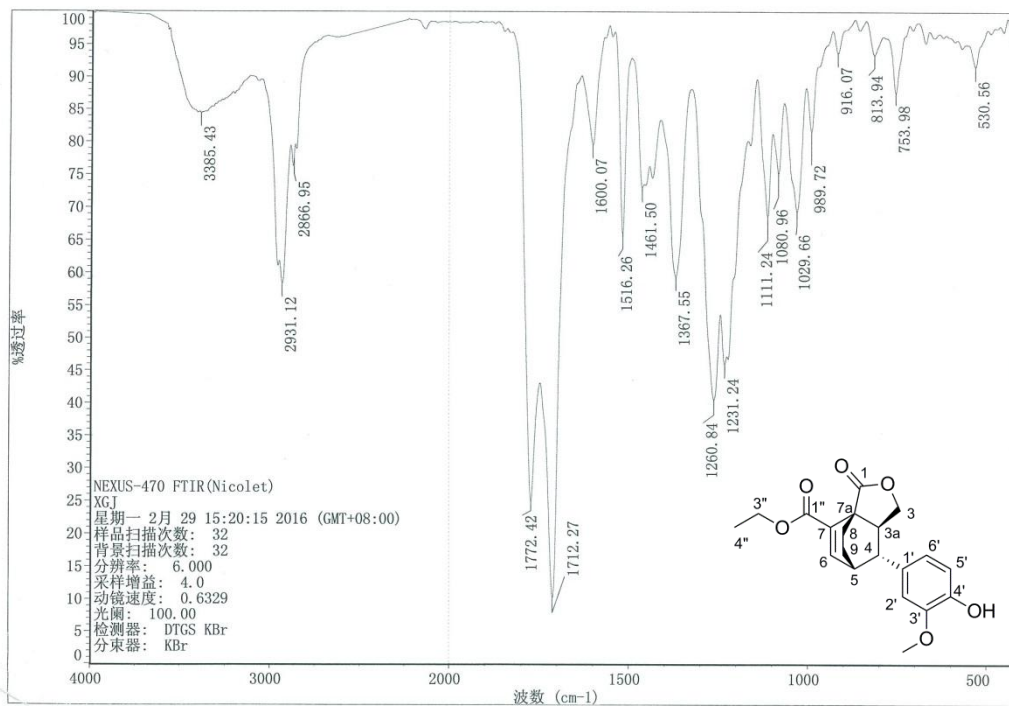

Figure S 17. IR spectrum of 1

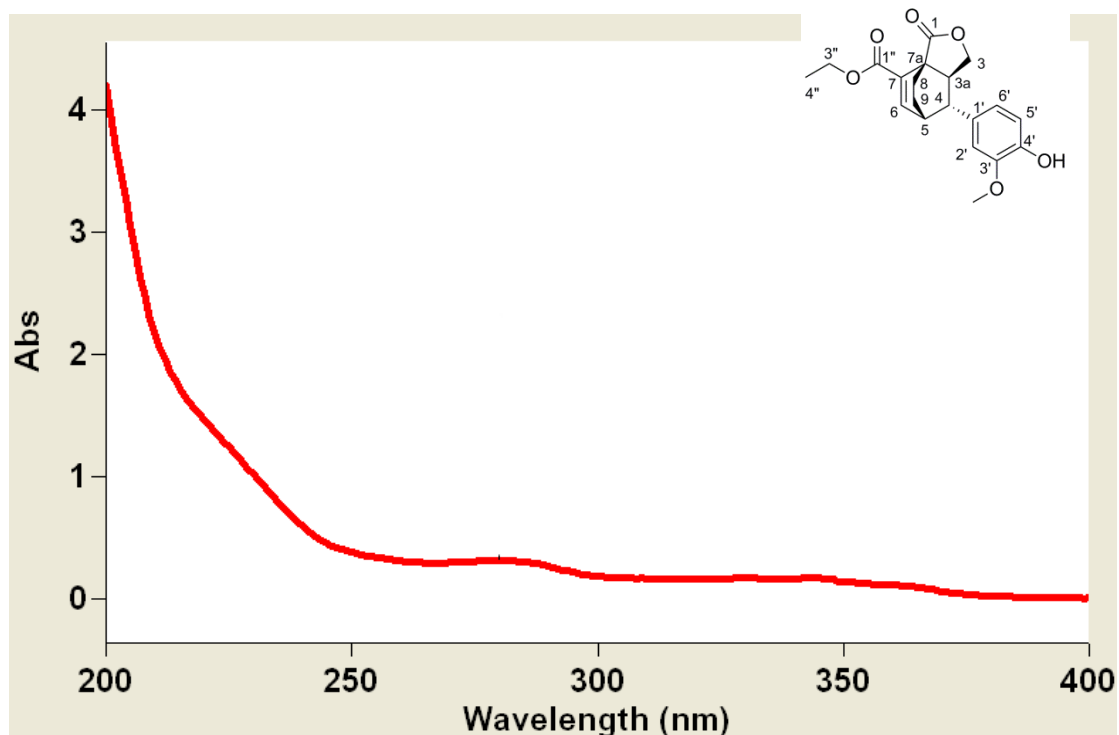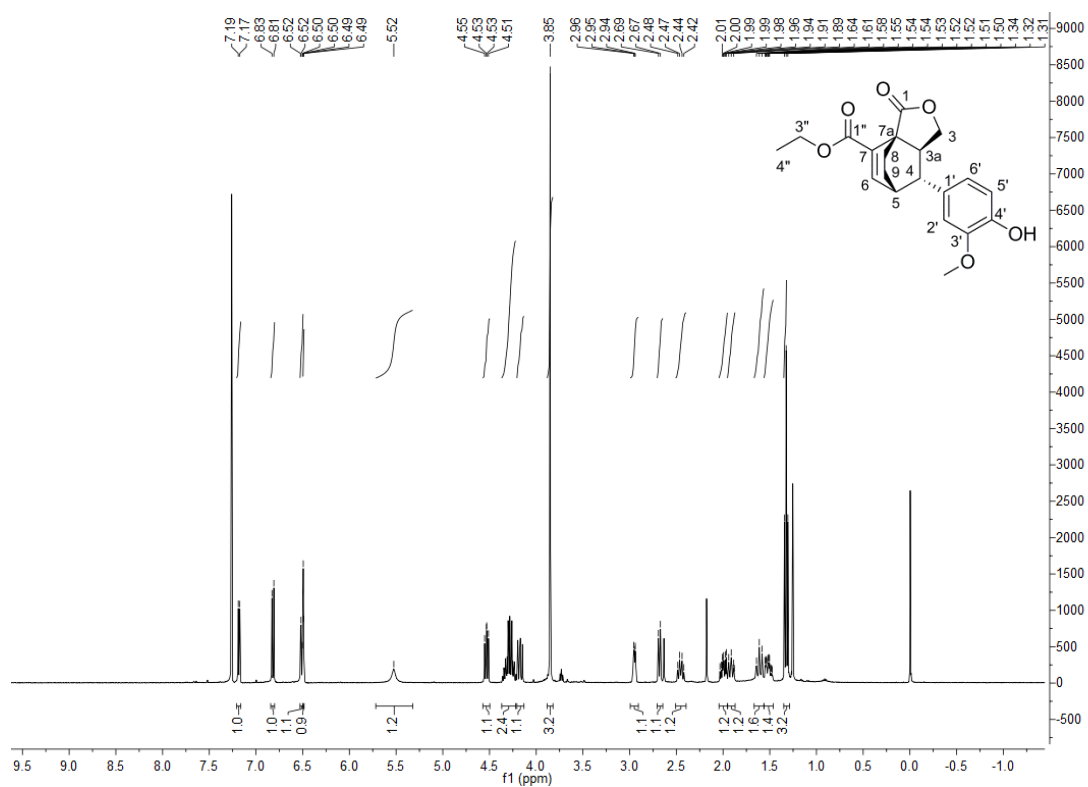

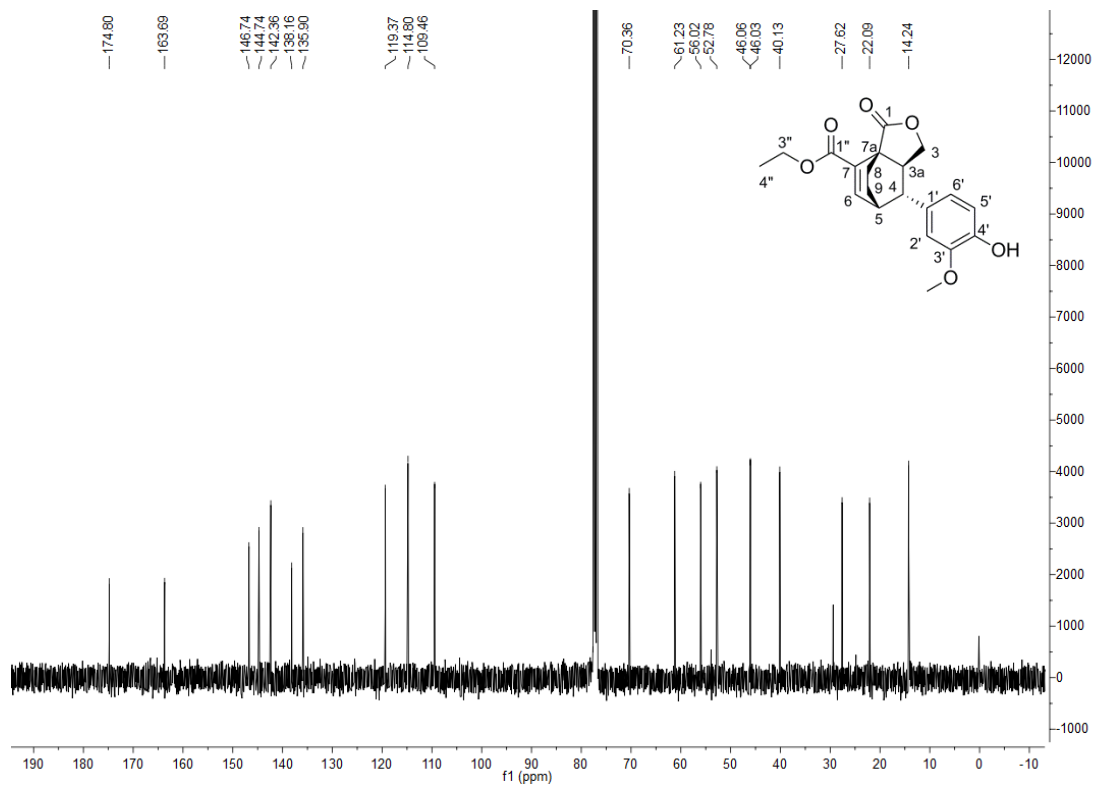

Figure S 20.  $^{13}\text{C}$  NMR spectrum of **1** in  $\text{CDCl}_3$

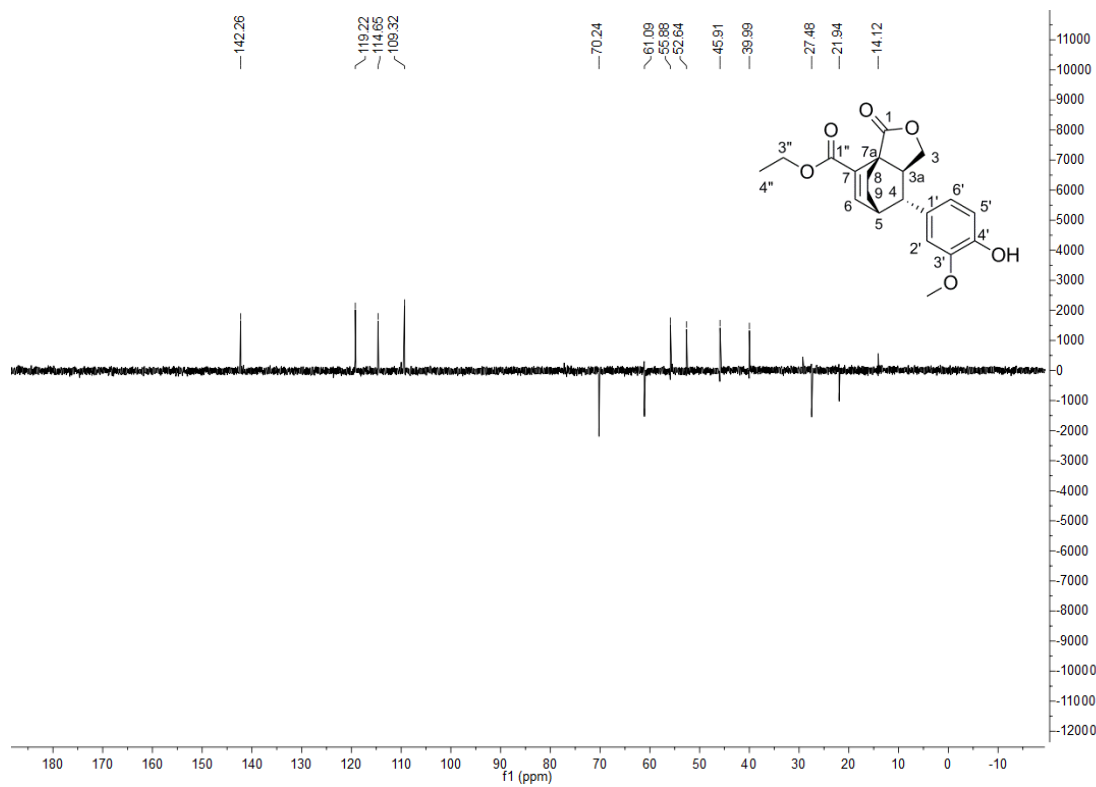

Figure S 21. DEPT 135 spectrum of **1** in  $\text{CDCl}_3$

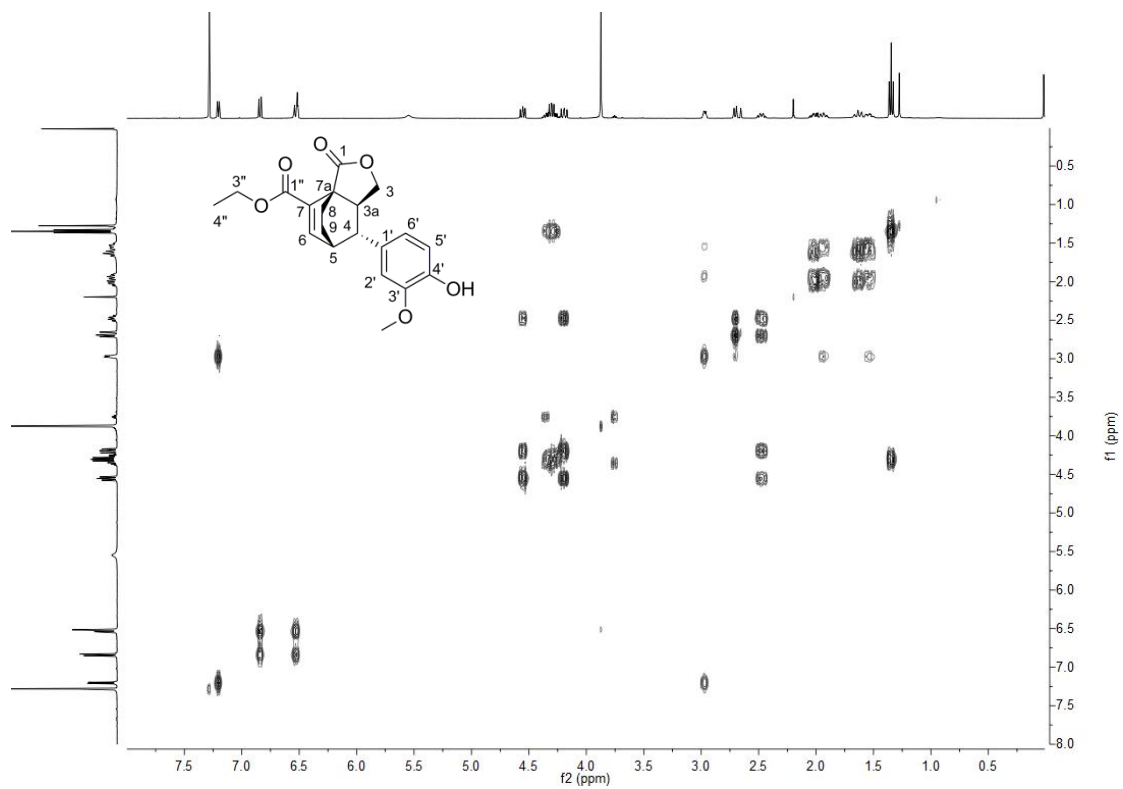

Figure S 22.  $^1\text{H}$ - $^1\text{H}$  COSY spectrum of **1** in  $\text{CDCl}_3$

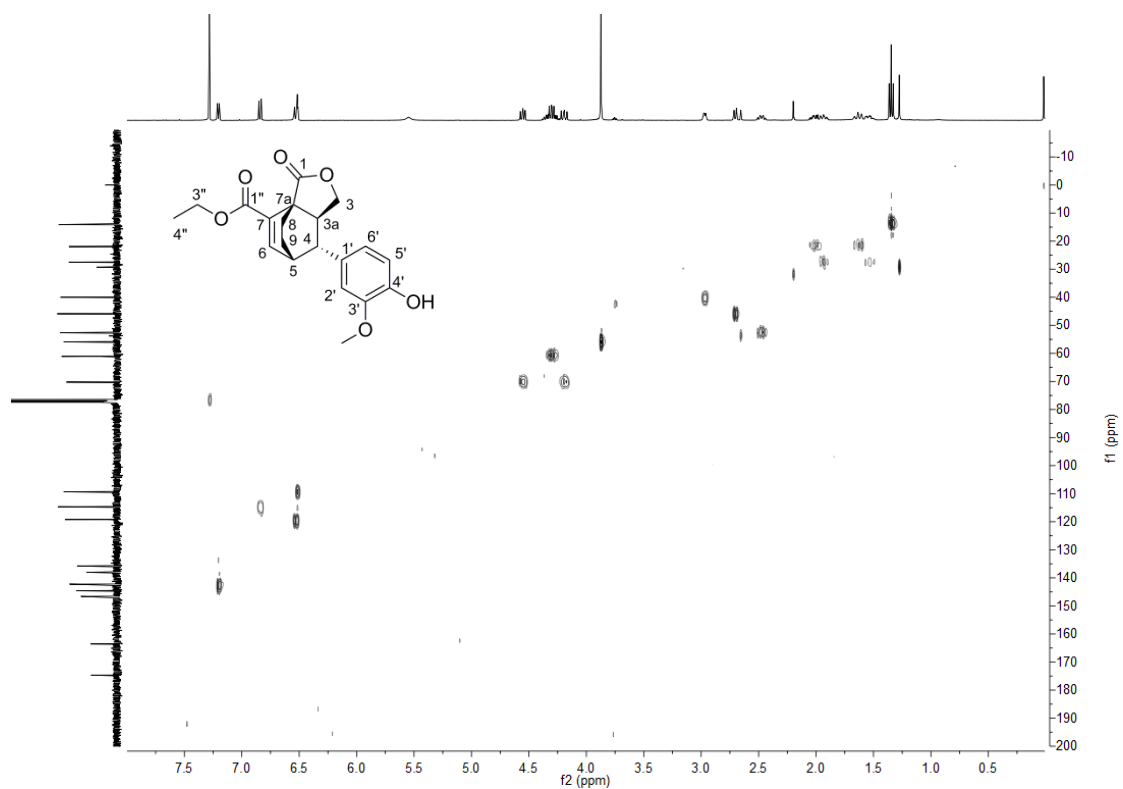

Figure S 23. HSQC spectrum of **1** in  $\text{CDCl}_3$

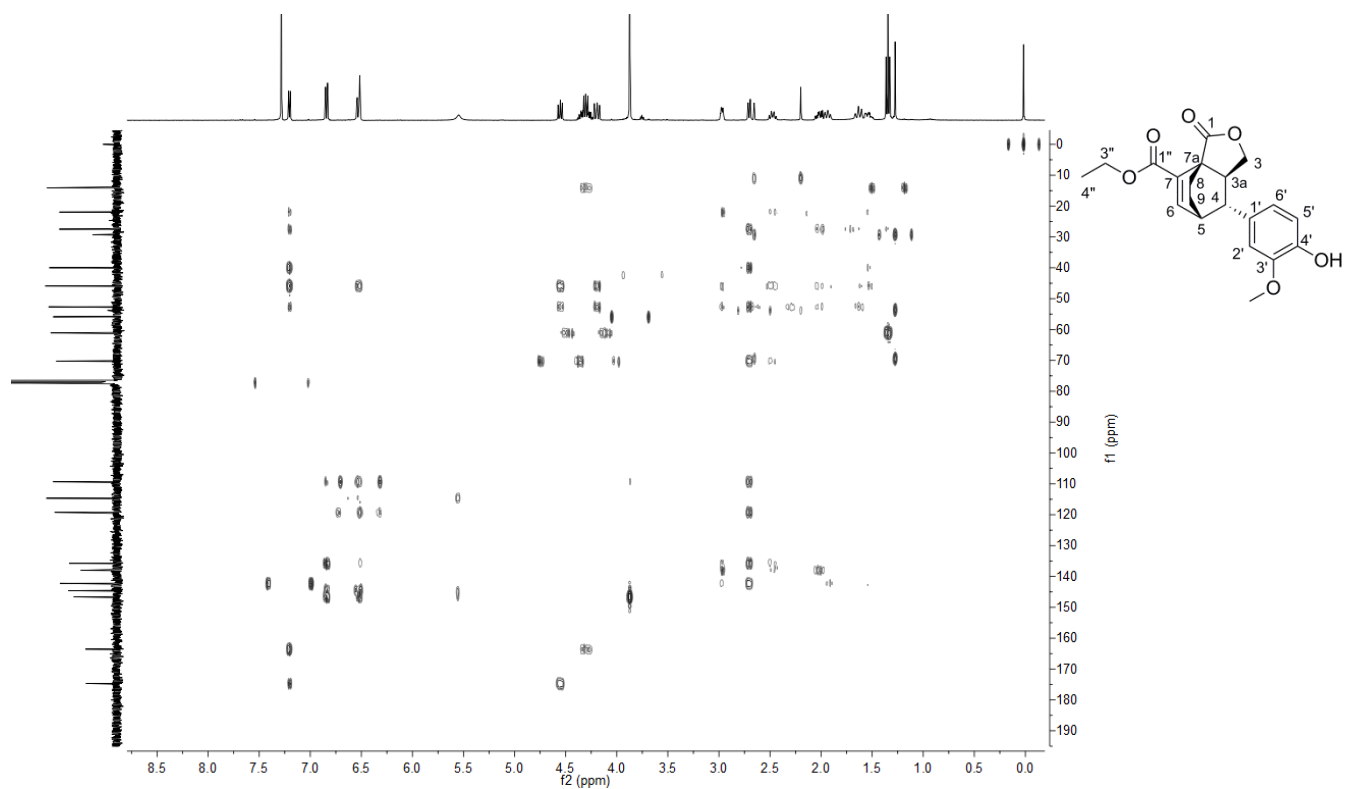

Figure S 24. HMBC spectrum of **1** in CDCl<sub>3</sub>

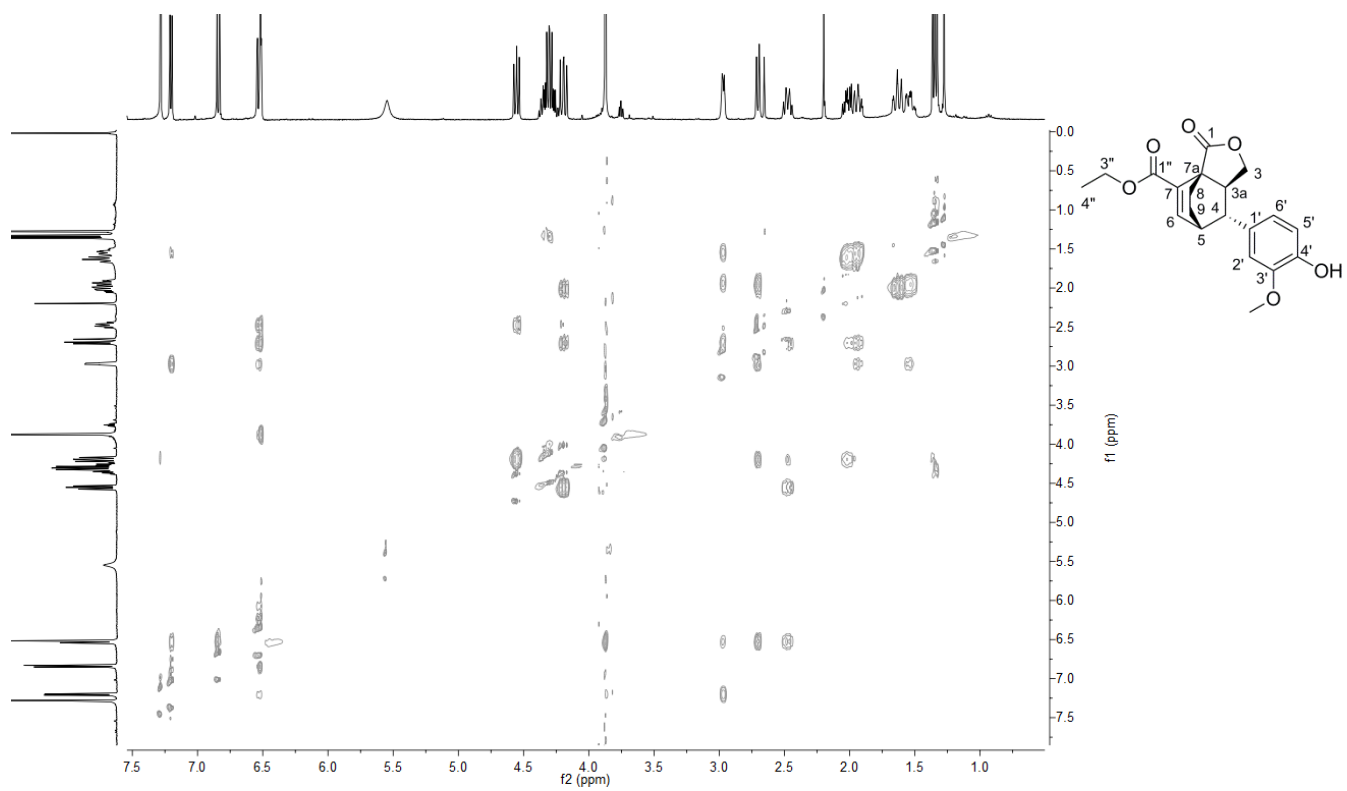

Figure S 25. NOESY spectrum of **1** in CDCl<sub>3</sub>



## Elemental Composition Report

### Single Mass Analysis

Tolerance = 5.0 PPM / DBE: min = -1.5, max = 50.0

Element prediction: Off

Number of isotope peaks used for i-FIT = 3

Monoisotopic Mass, Even Electron Ions

84 formula(e) evaluated with 1 results within limits (up to 50 closest results for each mass)

Elements Used:

C: 0-100 H: 0-200 O: 0-50

Xevo G2 Q-TOF/YCA166#

CX-20151106-A 13 (0.237) Cm (11:17-(2:7+23:58))

24-Nov-2015

Waters  
TOF MS ES+  
3.85e+006

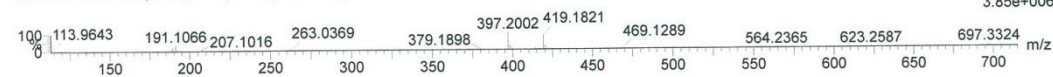

Minimum:

Maximum: 5.0 5.0 -1.5

50.0

| Mass | Calc. Mass | mDa | PPM | DBE | i-FIT | Norm | Conf(%) | Formula |
|------|------------|-----|-----|-----|-------|------|---------|---------|
|------|------------|-----|-----|-----|-------|------|---------|---------|

|          |          |      |      |      |       |     |     |            |
|----------|----------|------|------|------|-------|-----|-----|------------|
| 397.2002 | 397.2015 | -1.3 | -3.3 | 10.5 | 408.5 | n/a | n/a | C24 H29 O5 |
|----------|----------|------|------|------|-------|-----|-----|------------|

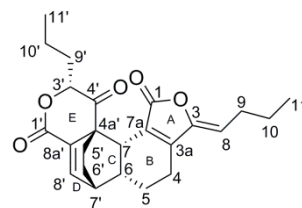

Page 1

Figure S 26. HRESIMS data of **2**

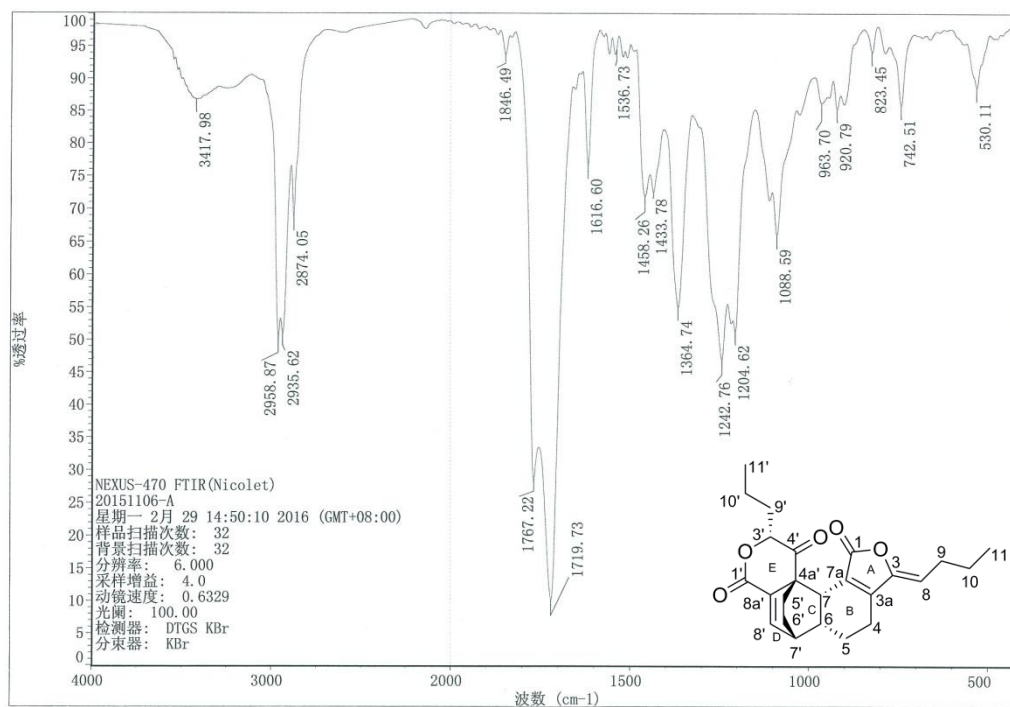

Figure S 27. IR spectrum of **2**

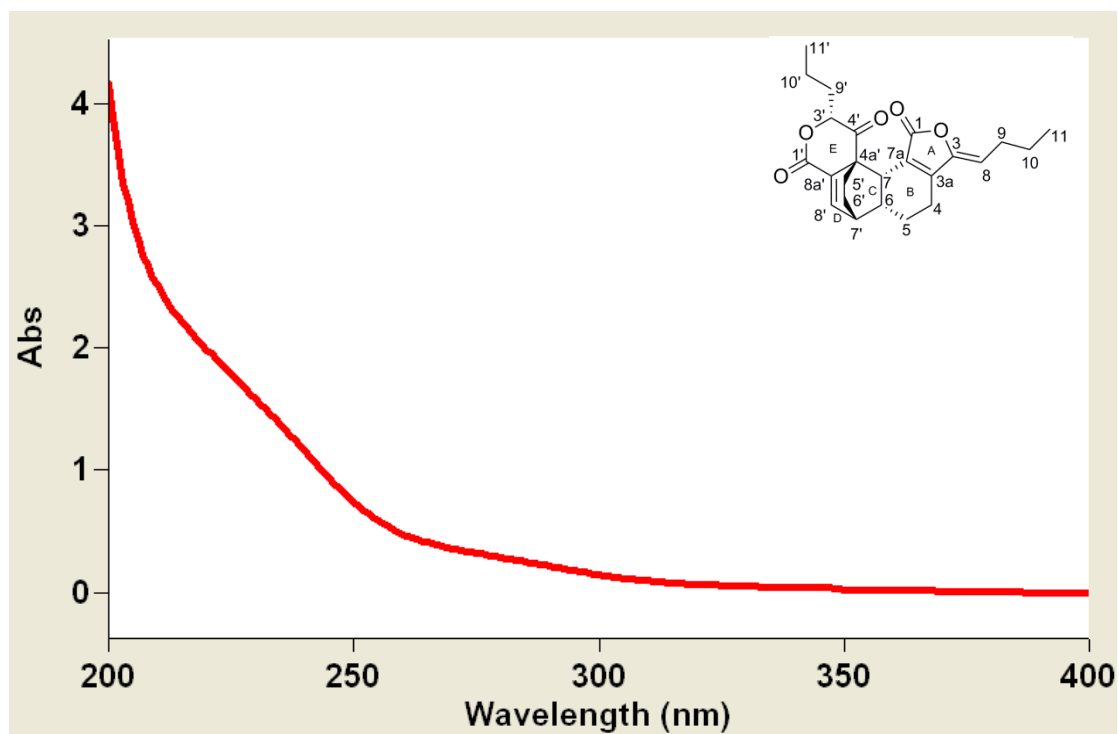

Figure S 28. UV spectrum of **2** in MeOH

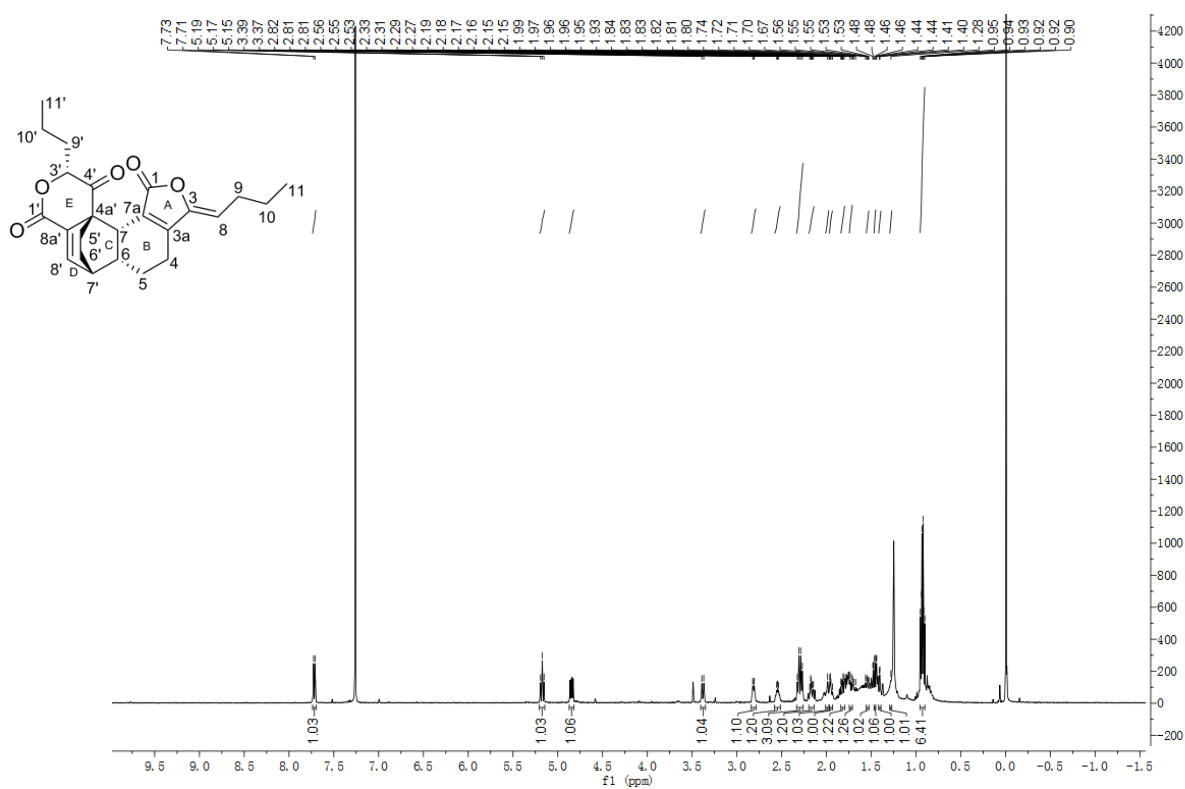

Figure S 29. <sup>1</sup>H NMR spectrum of **2** in CDCl<sub>3</sub>

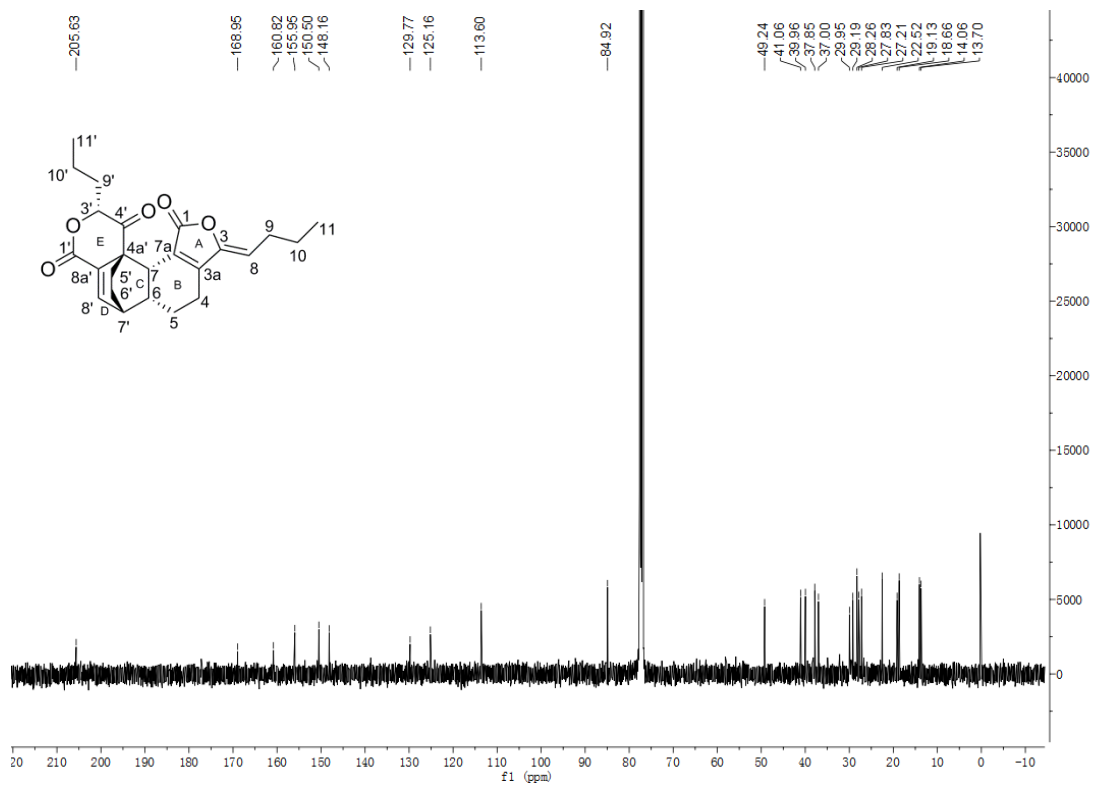

Figure S 30.  $^{13}\text{C}$  NMR spectrum of **2** in  $\text{CDCl}_3$

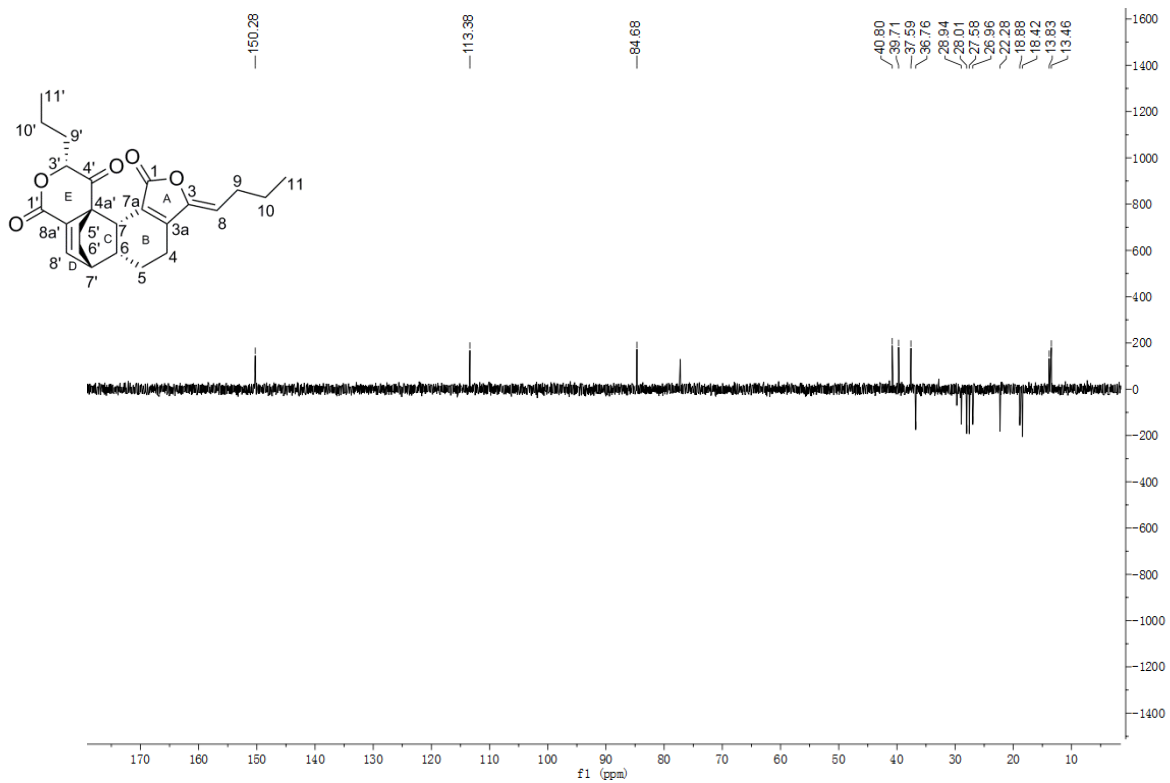

Figure S 31. DEPT spectrum of **2** in  $\text{CDCl}_3$

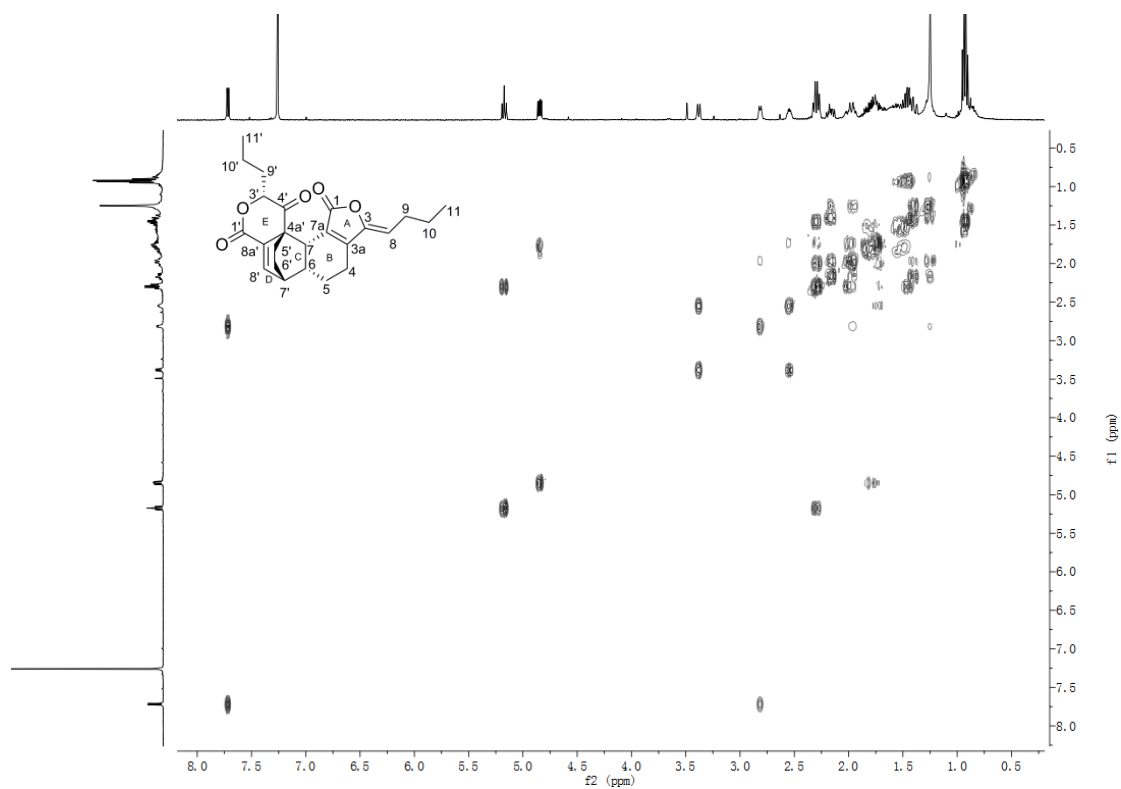

Figure S 32.  $^1\text{H}$ - $^1\text{H}$  COSY spectrum of **2** in  $\text{CDCl}_3$

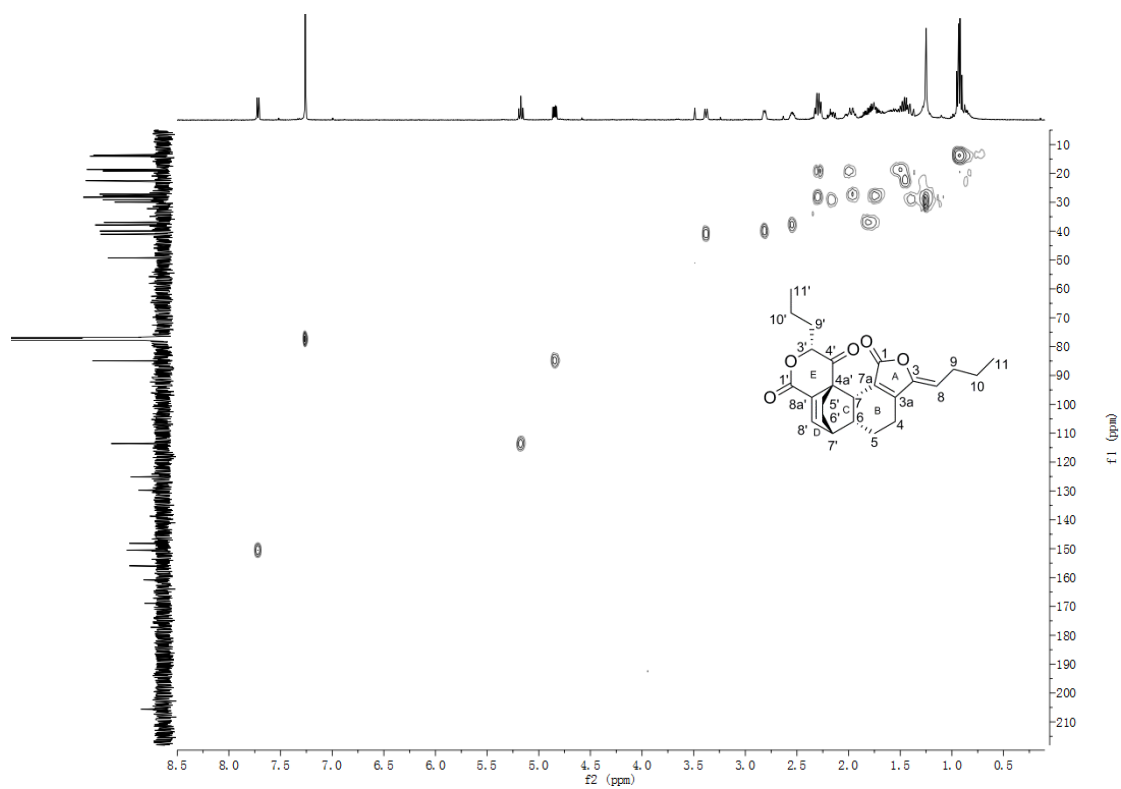

Figure S 33. HSQC spectrum of **2** in  $\text{CDCl}_3$

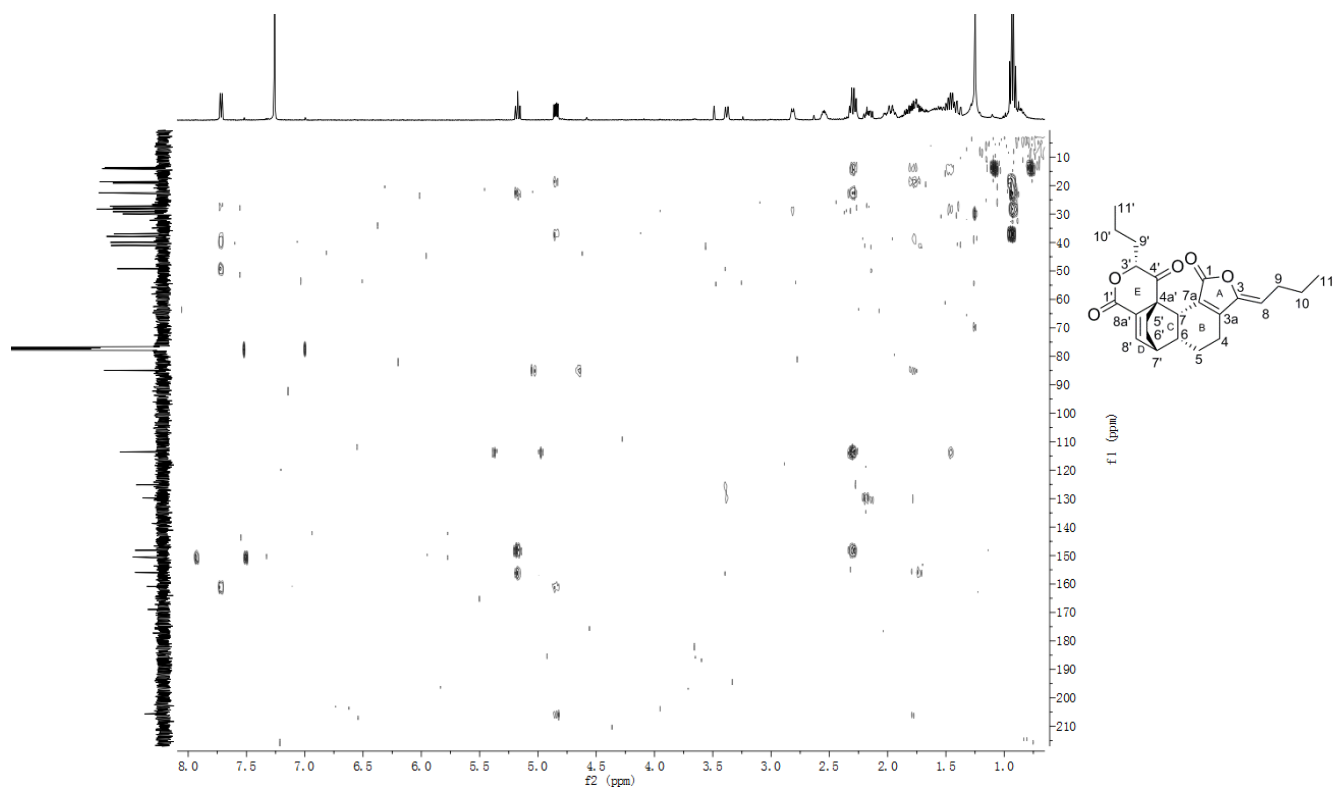

Figure S 34. HMBC spectrum of **2** in CDCl<sub>3</sub>

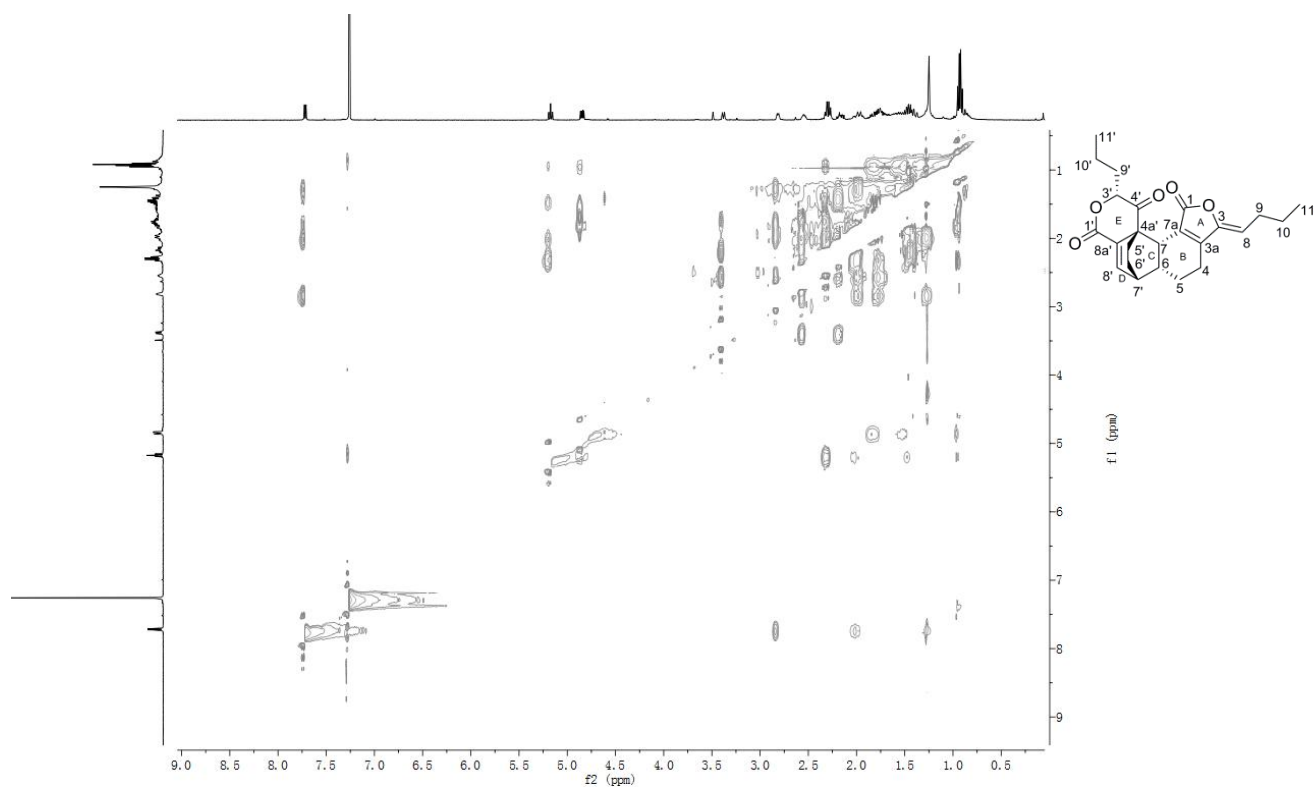

Figure S 35. NOESY spectrum of **2** in CDCl<sub>3</sub>

## Elemental Composition Report

Page 1

### Single Mass Analysis

Tolerance = 5.0 PPM / DBE: min = -1.5, max = 50.0

Element prediction: Off

Number of isotope peaks used for i-FIT = 3

Monoisotopic Mass, Even Electron Ions

66 formula(e) evaluated with 1 results within limits (up to 50 closest results for each mass)

Elements Used:

C: 0-100 H: 0-200 O: 0-50

Xevo G2 Q-TOF/YCA166#

20151119-A 13 (0.237) Cm (11:18-(2:8+24:55))

24-Nov-2015

Waters  
TOF MS ES+  
1.19e+007

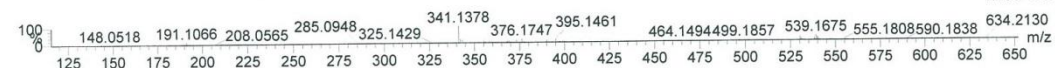

Minimum:

Maximum: 5.0 5.0 -1.5 50.0

| Mass | Calc. Mass | mDa | PPM | DBE | i-FIT | Norm | Conf(%) | Formula |
|------|------------|-----|-----|-----|-------|------|---------|---------|
|------|------------|-----|-----|-----|-------|------|---------|---------|

|          |          |      |      |      |       |     |     |            |
|----------|----------|------|------|------|-------|-----|-----|------------|
| 341.1378 | 341.1389 | -1.1 | -3.2 | 10.5 | 564.3 | n/a | n/a | C20 H21 O5 |
|----------|----------|------|------|------|-------|-----|-----|------------|

Figure S 36. HRESIMS data of **3**

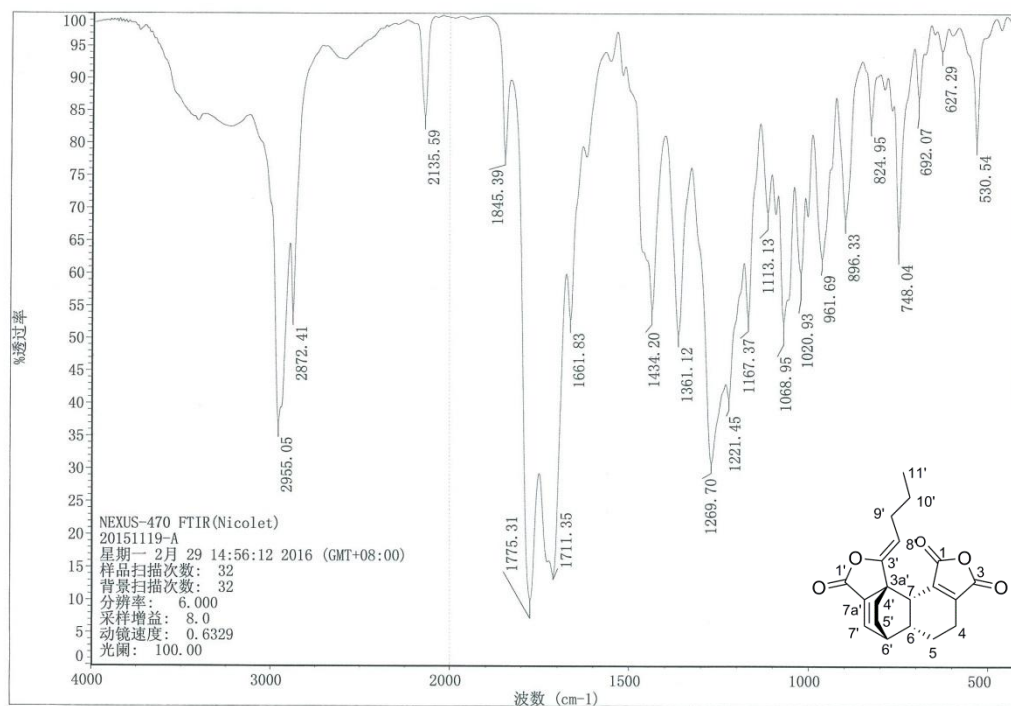

Figure S 37. IR spectrum of **3**

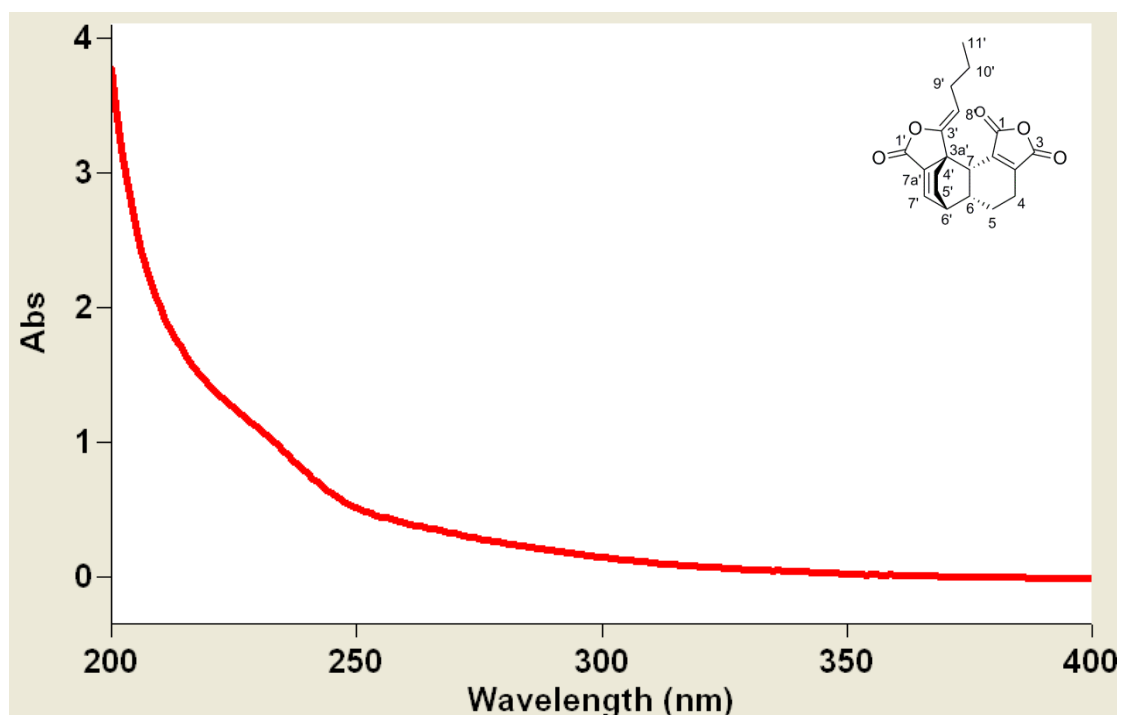

Figure S 38. UV spectrum of **3** in MeOH

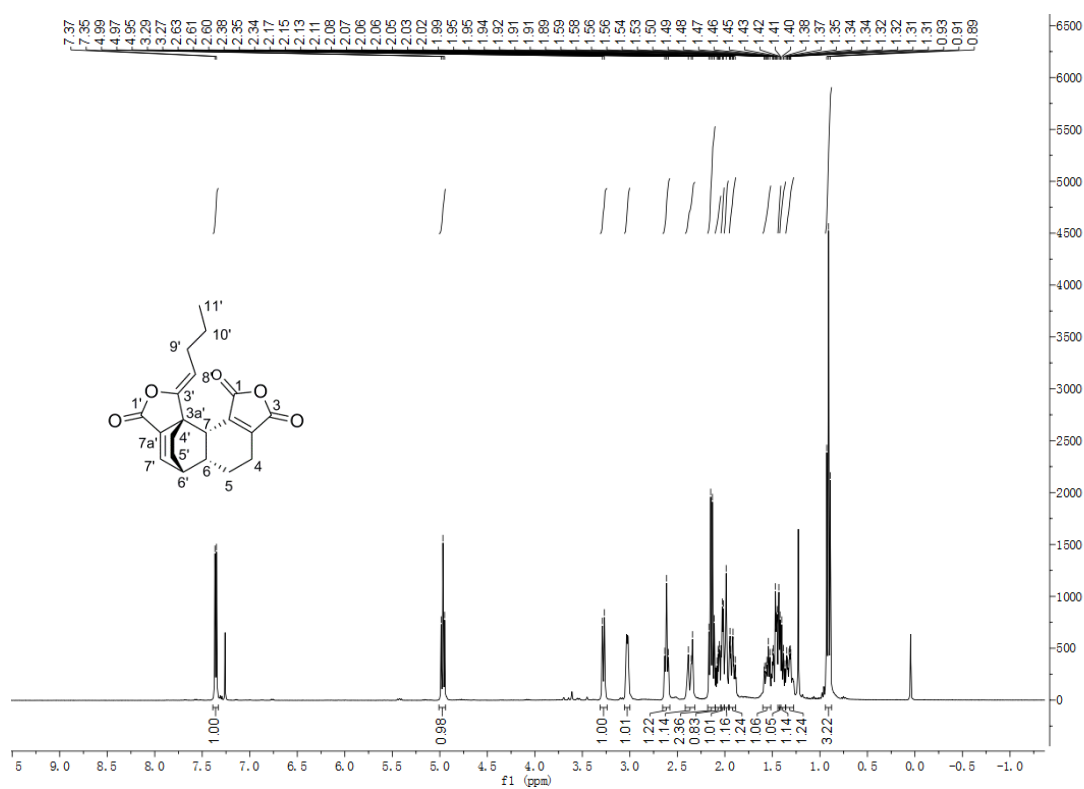

Figure S 39. <sup>1</sup>H NMR spectrum of **3** in CDCl<sub>3</sub>

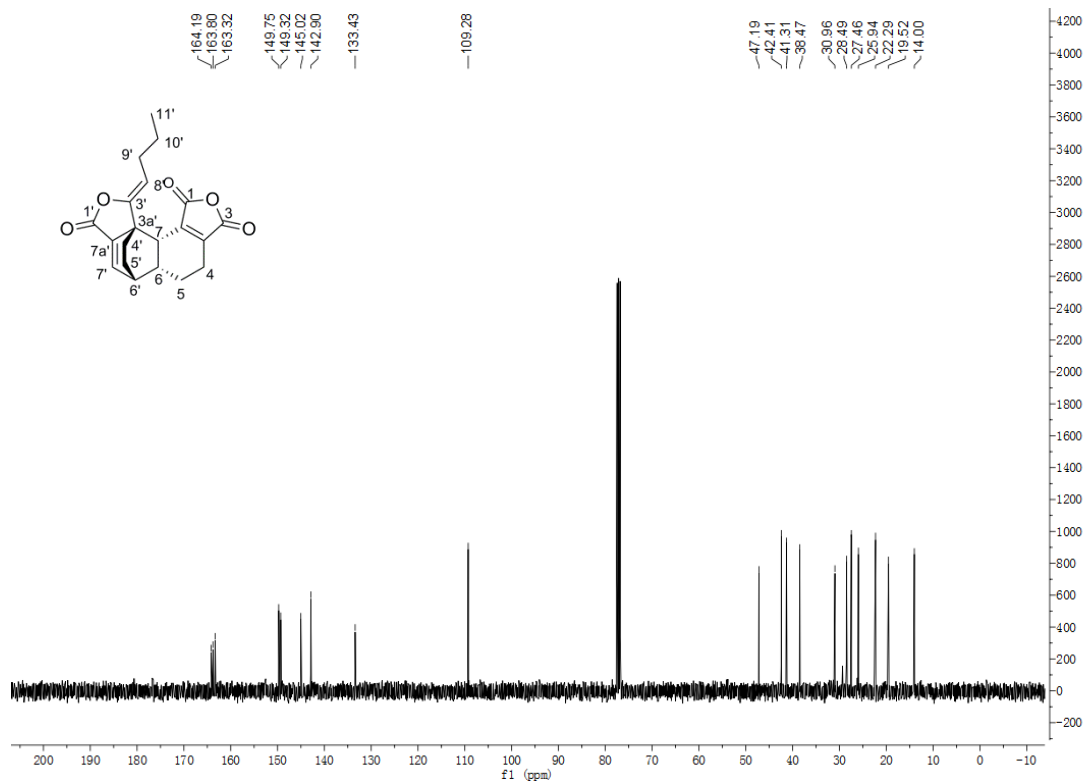

Figure S 40.  $^{13}\text{C}$  NMR spectrum of **3** in  $\text{CDCl}_3$

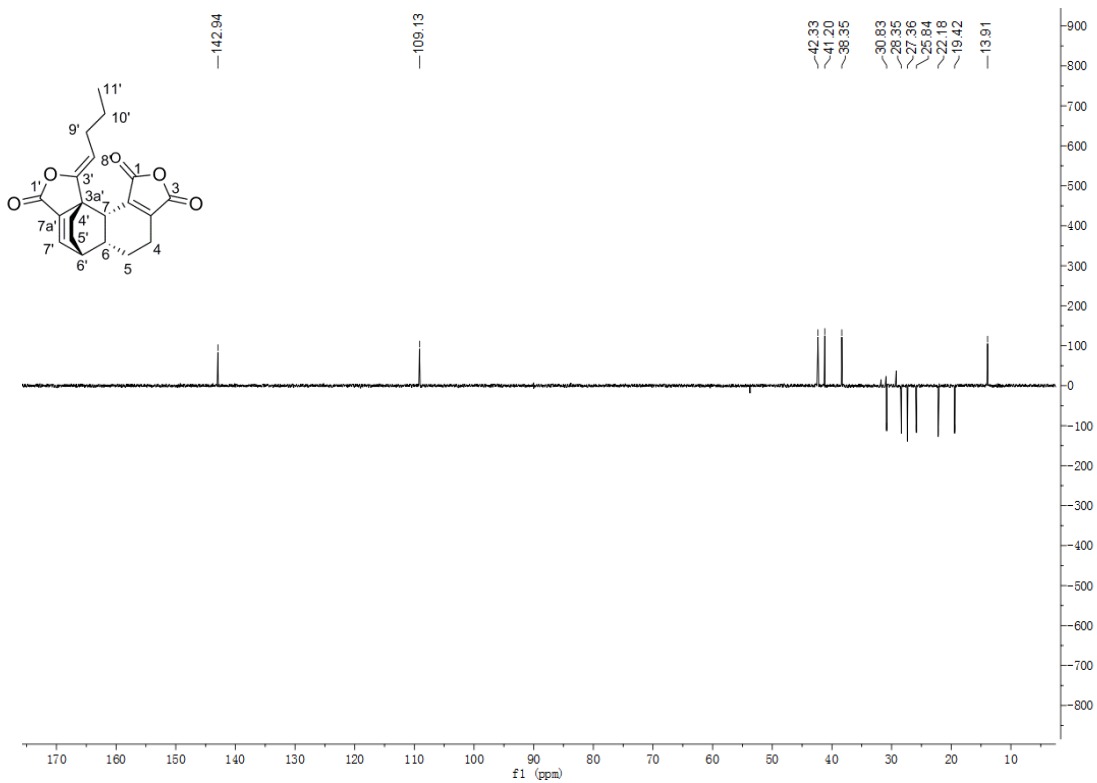

Figure S 41. DEPT spectrum of **3** in  $\text{CDCl}_3$



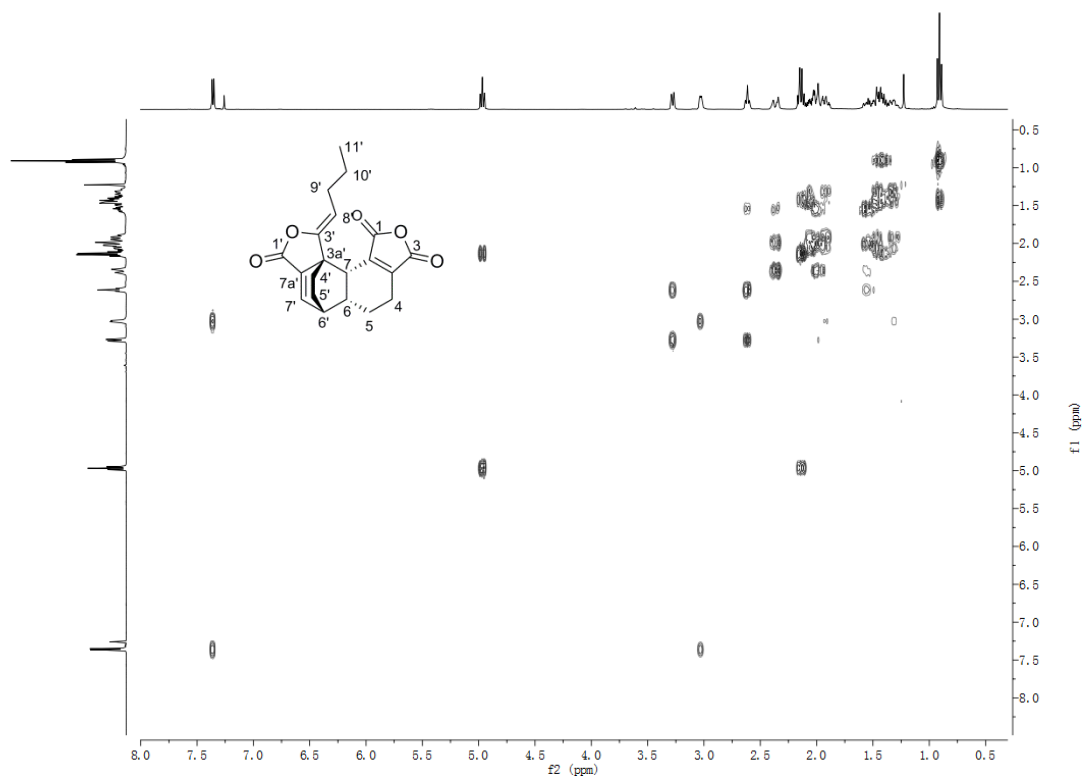

Figure S 42.  $^1\text{H}$ - $^1\text{H}$  COSY spectrum of **3** in  $\text{CDCl}_3$

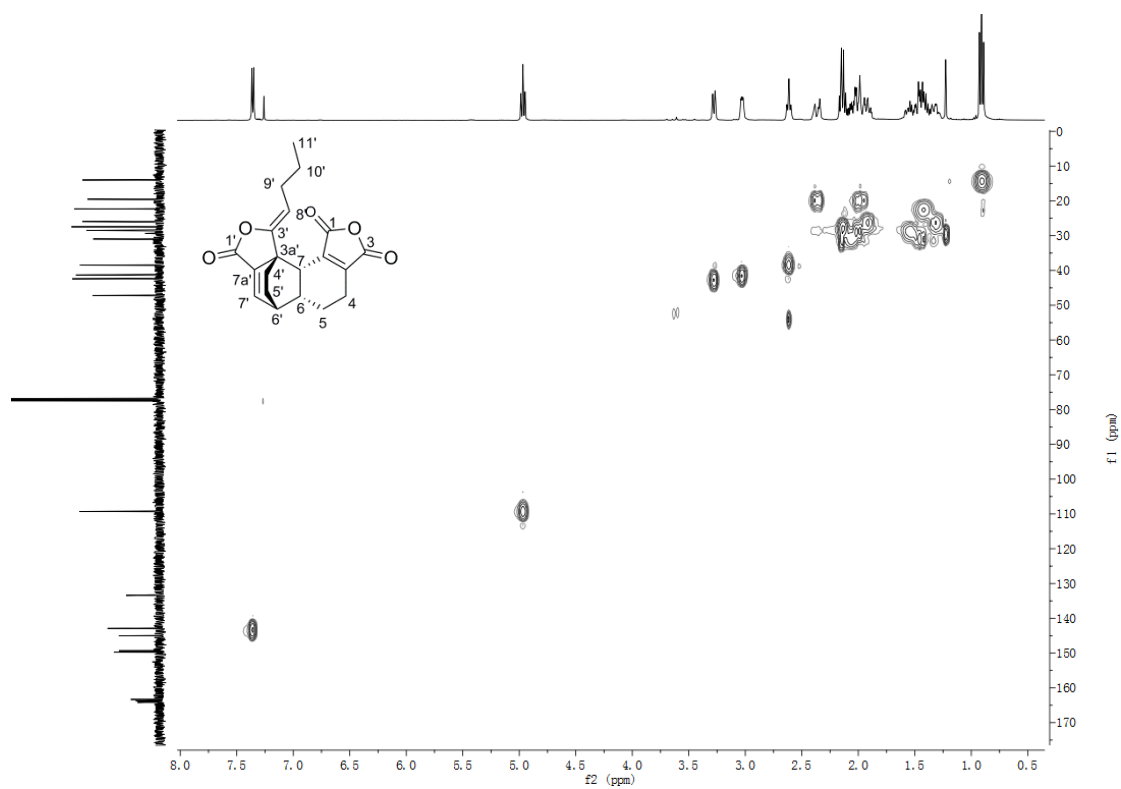

Figure S 43. HSQC spectrum of **3** in  $\text{CDCl}_3$

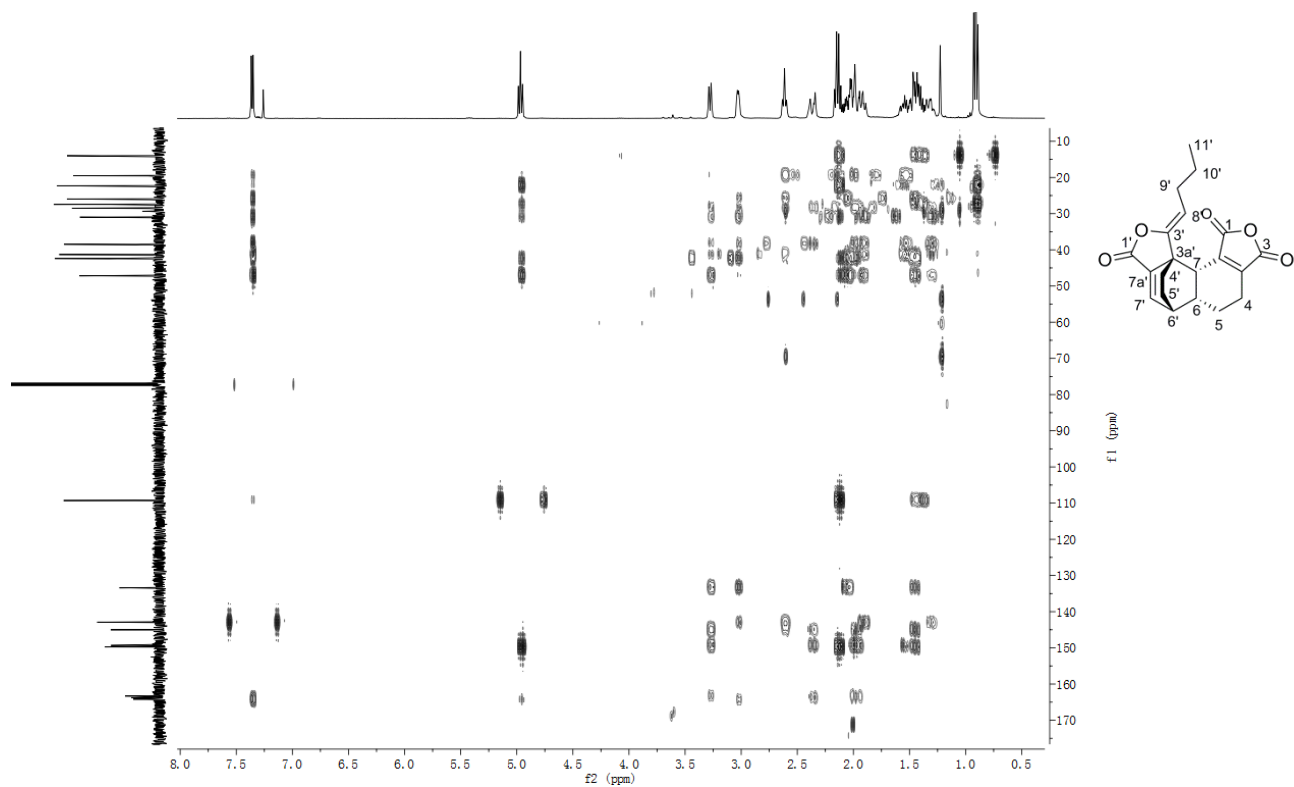

Figure S 44. HMBC spectrum of **3** in CDCl<sub>3</sub>

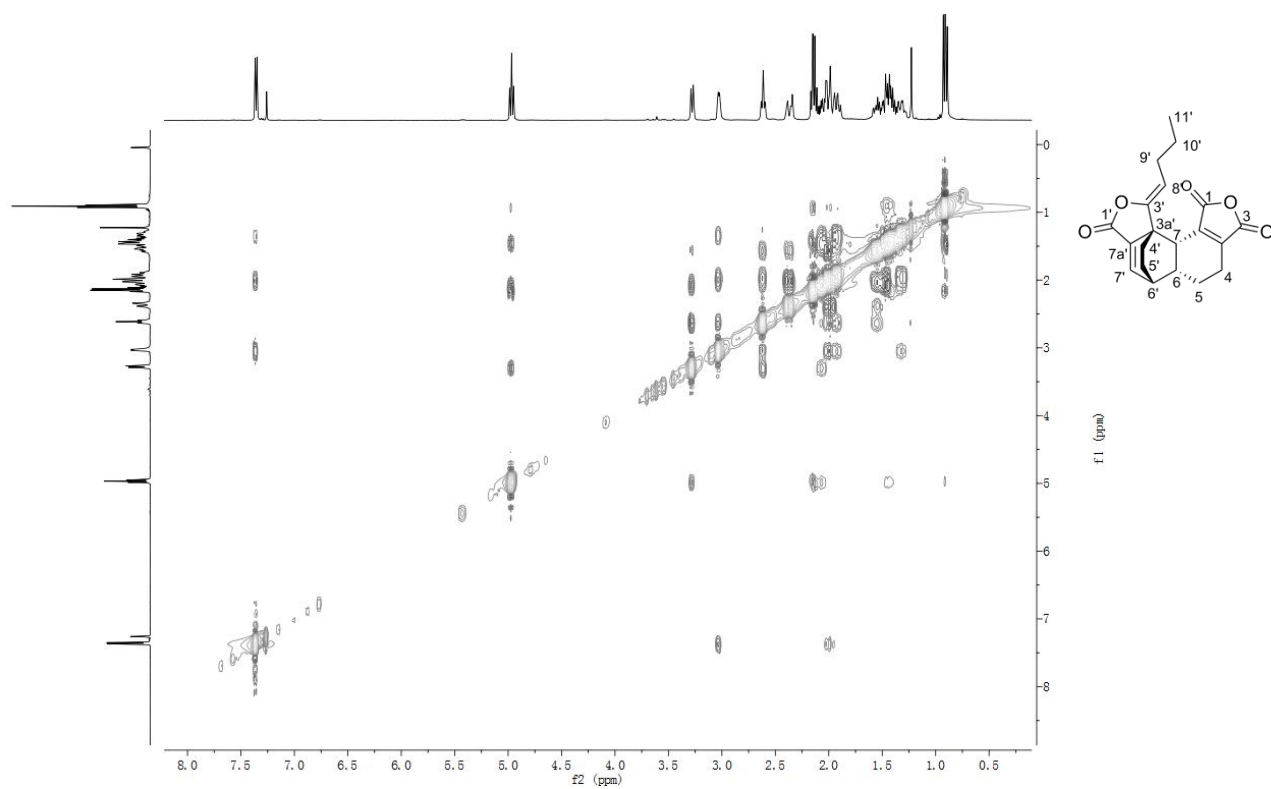

Figure S 45. NOESY spectrum of **3** in CDCl<sub>3</sub>

## Elemental Composition Report

### Single Mass Analysis

Tolerance = 5.0 PPM / DBE: min = -1.5, max = 50.0  
 Element prediction: Off  
 Number of isotope peaks used for i-FIT = 3

Monoisotopic Mass, Even Electron Ions

194 formula(e) evaluated with 1 results within limits (up to 50 closest results for each mass)

Elements Used:

C: 0-100 H: 0-200 O: 0-50 Na: 0-1

Xevo G2 Q-TOF/YCA166#

24-Nov-2015

20151119-C POS 13 (0.237) Cm (11:16-(1:7+22:39))

Waters  
 TOF MS ES+  
 8.33e+006

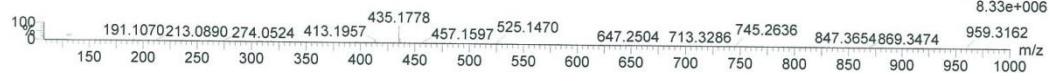

Minimum: -1.5  
 Maximum: 5.0 5.0 50.0

| Mass     | Calc. Mass | mDa  | PPM  | DBE  | i-FIT | Norm | Conf(%) | Formula                                           |
|----------|------------|------|------|------|-------|------|---------|---------------------------------------------------|
| 435.1778 | 435.1784   | -0.6 | -1.4 | 10.5 | 416.7 | n/a  | n/a     | C <sub>24</sub> H <sub>28</sub> O <sub>6</sub> Na |

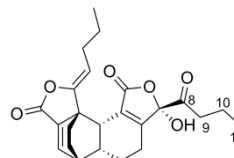

Figure S 46. HRESIMS data of 4

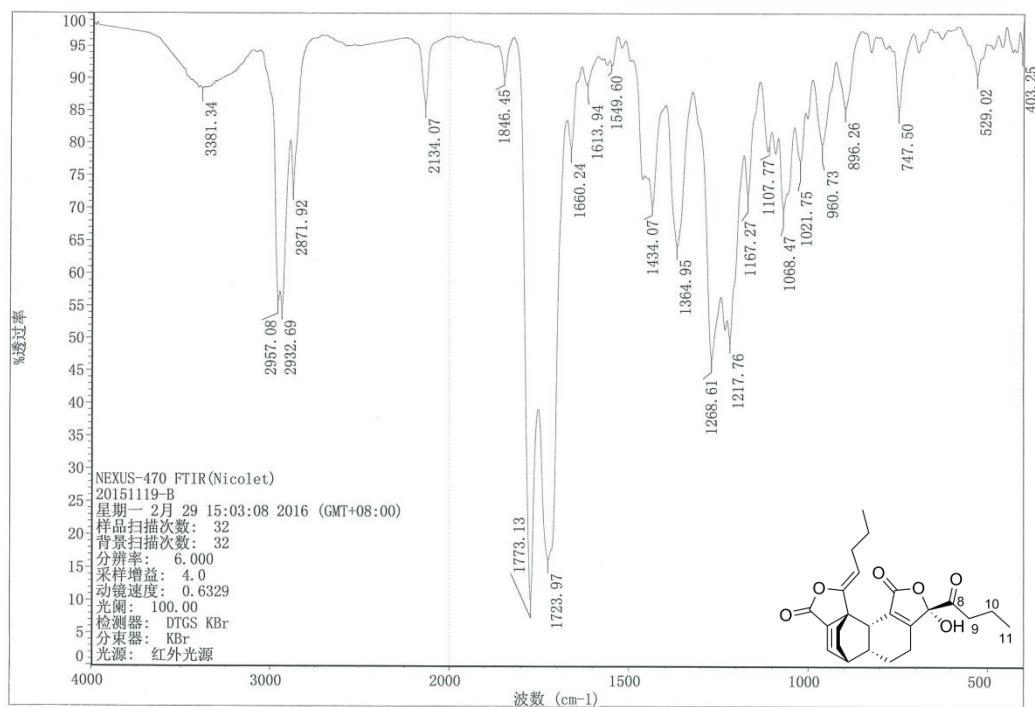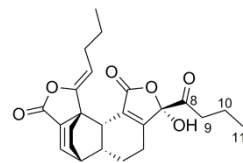

Figure S 47. IR spectrum of 4

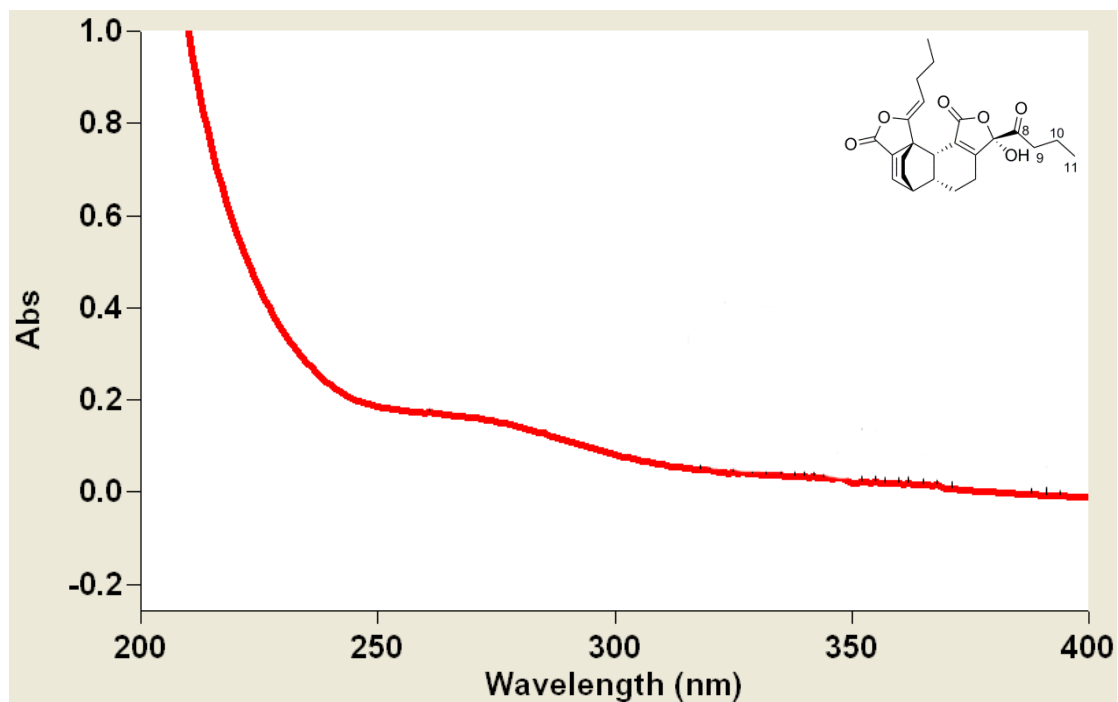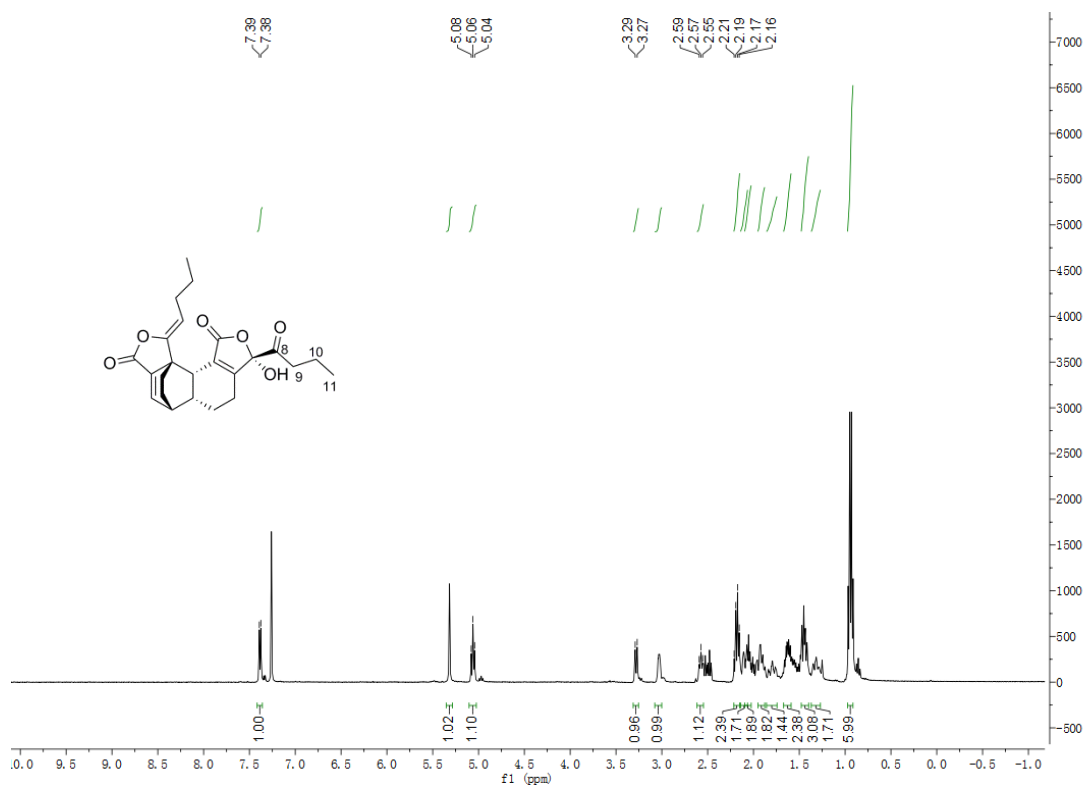

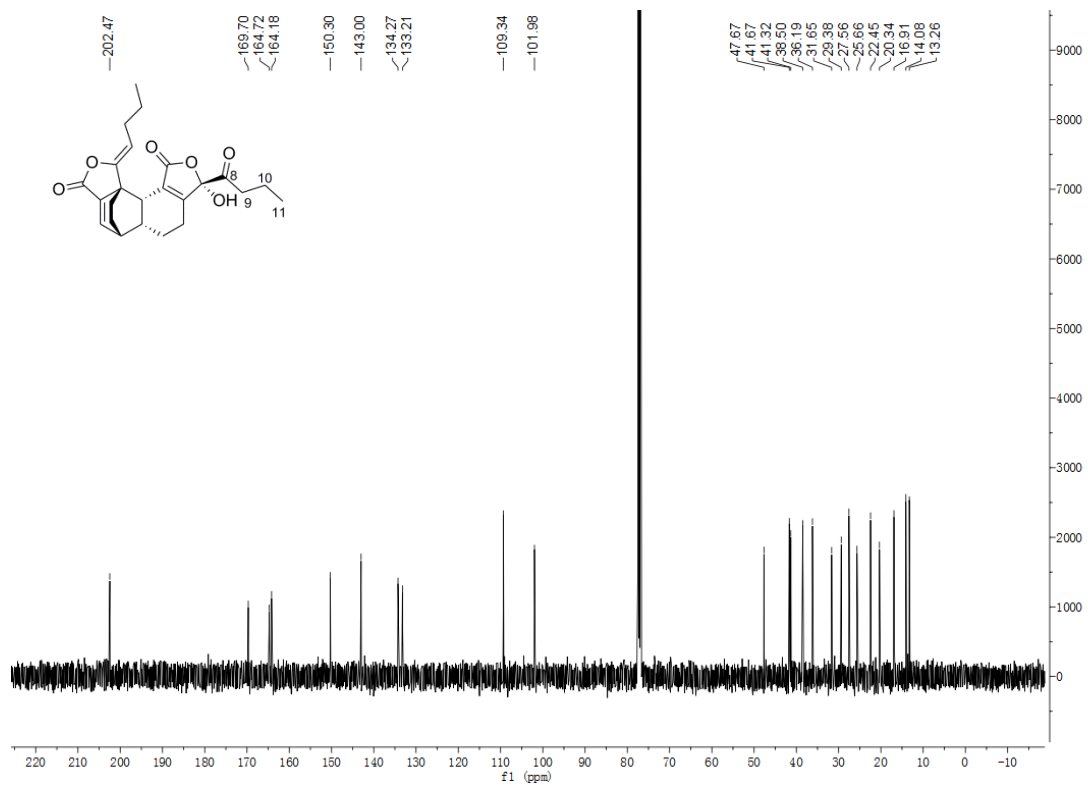

Figure S 50.  $^{13}\text{C}$  NMR spectrum of **4** in  $\text{CDCl}_3$

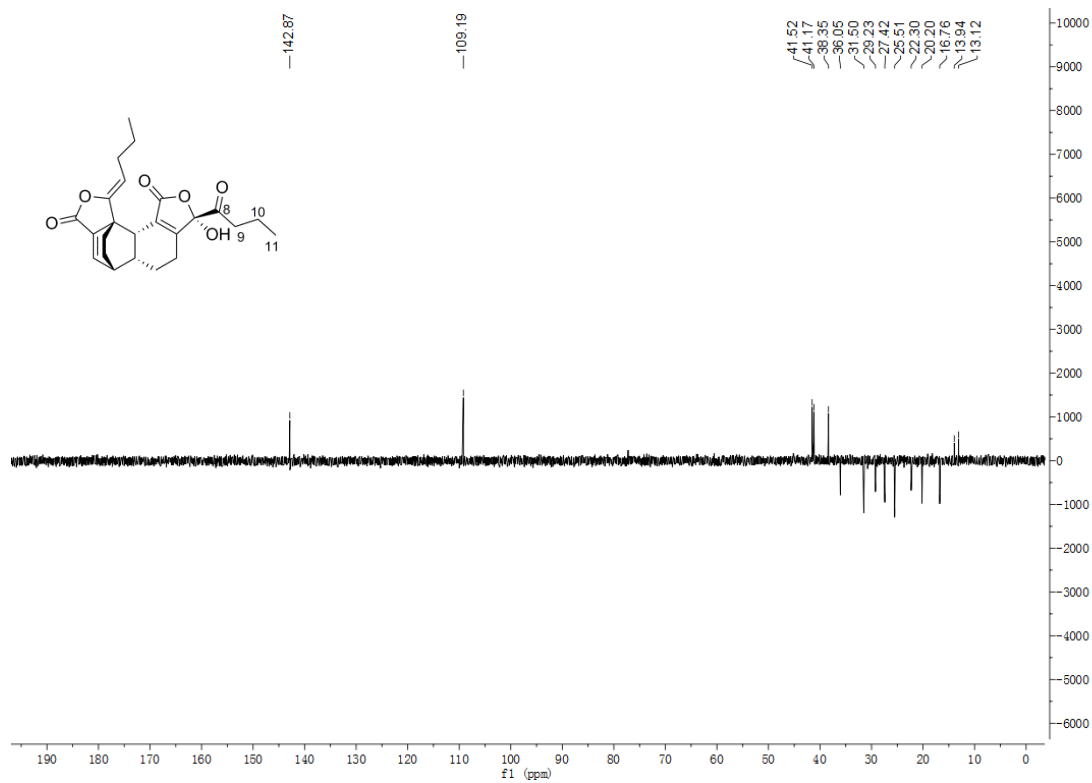

Figure S 51. DEPT spectrum of **4** in  $\text{CDCl}_3$

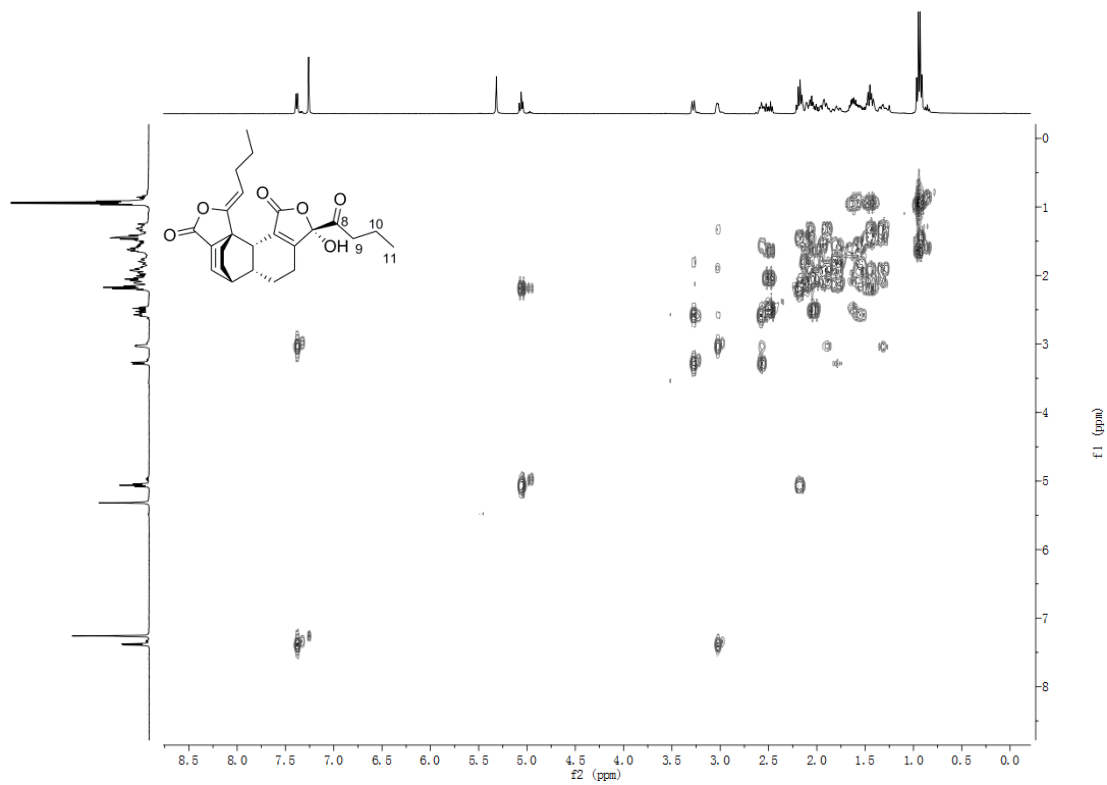

Figure S 52.  $^1\text{H}$ - $^1\text{H}$  COSY spectrum of **4** in  $\text{CDCl}_3$

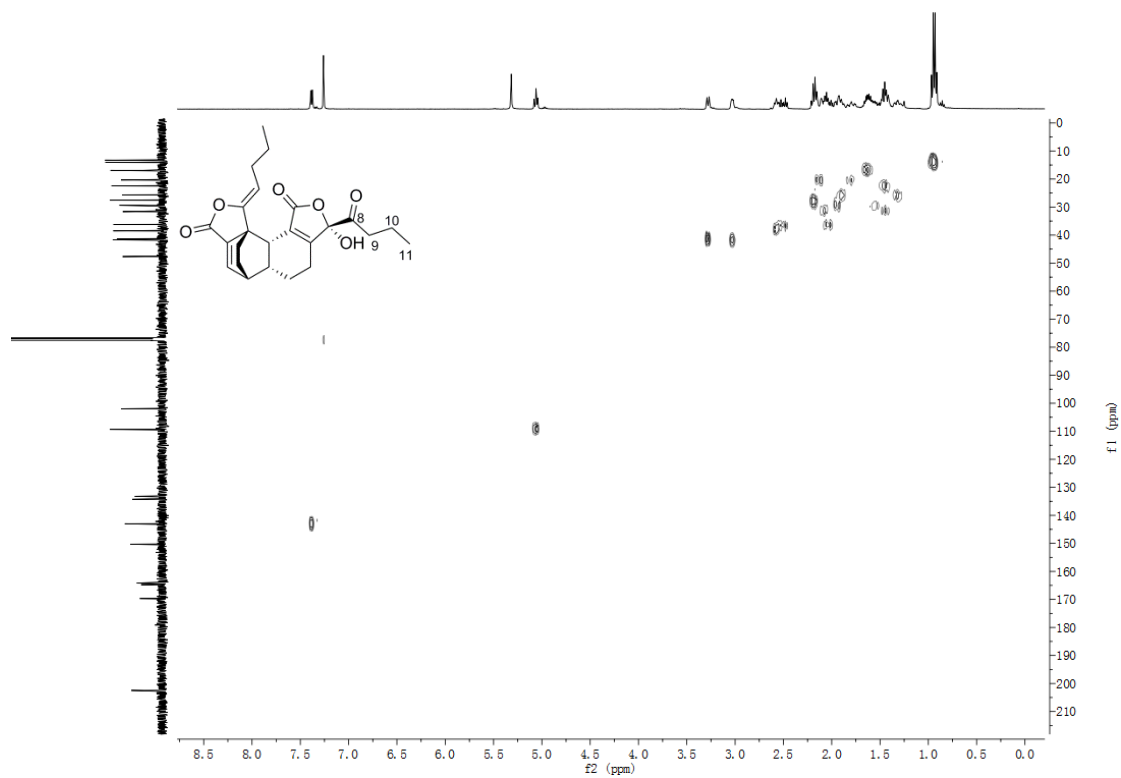

Figure S 53. HSQC spectrum of **4** in  $\text{CDCl}_3$

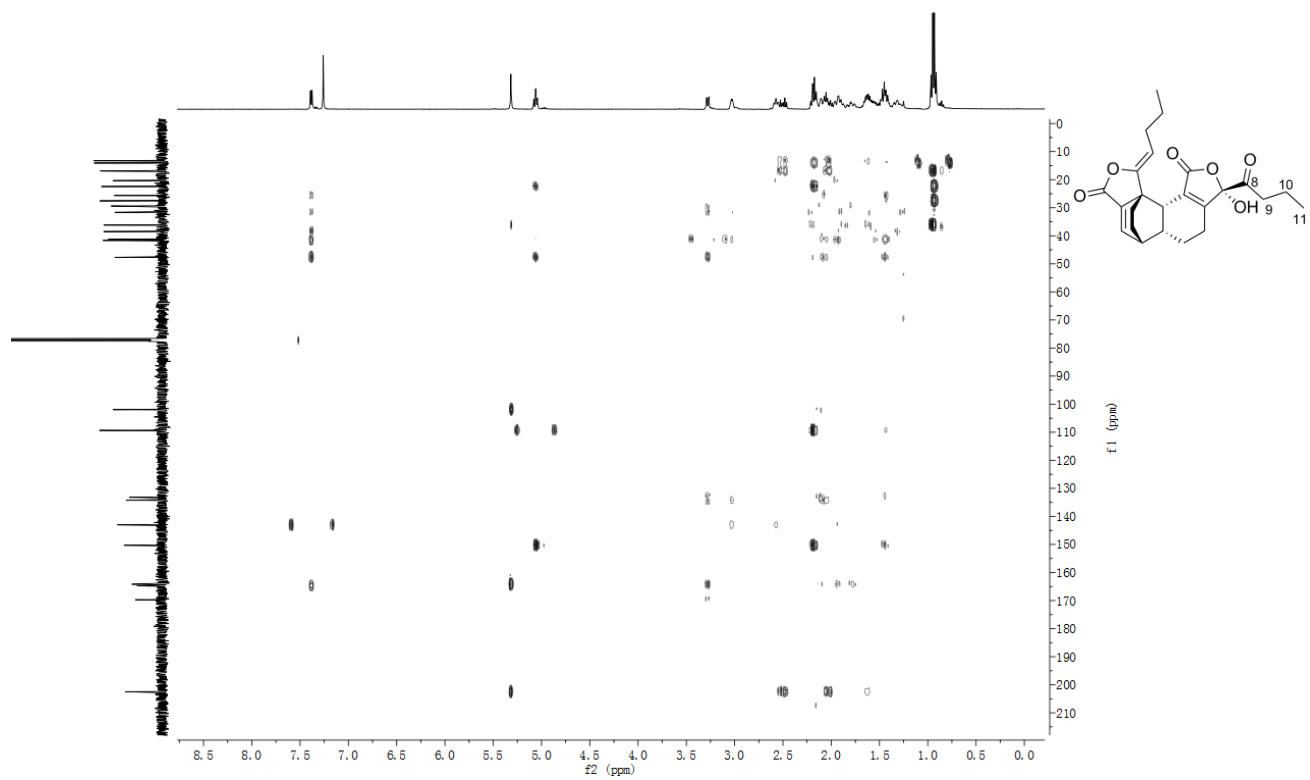

Figure S 54. HMBC spectrum of **4** in CDCl<sub>3</sub>

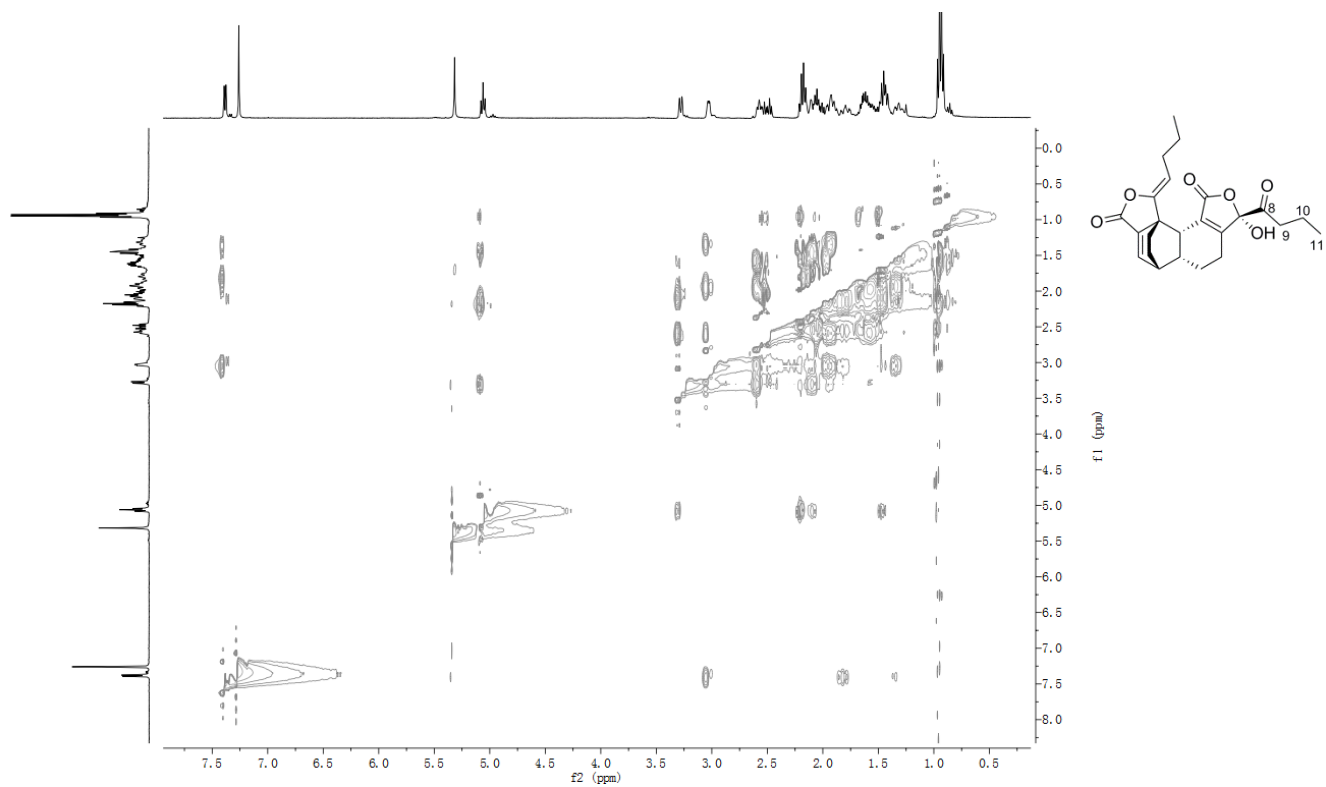

Figure S 55. NOESY spectrum of **4** in CDCl<sub>3</sub>

## Elemental Composition Report

Page 1

### Single Mass Analysis

Tolerance = 5.0 PPM / DBE: min = -1.5, max = 50.0  
 Element prediction: Off  
 Number of isotope peaks used for i-FIT = 3

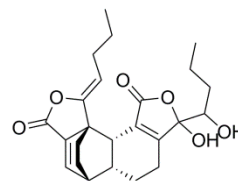

### Monoisotopic Mass, Even Electron Ions

178 formula(e) evaluated with 1 results within limits (up to 50 closest results for each mass)

Elements Used:

C: 0-100 H: 0-200 O: 0-50 Na: 0-1

Xevo G2 Q-TOF/YCA166#

21-Dec-2015

20151123-A HRMS 12 (0.233) Cm (10:15-(2:8+21:54))

Waters  
 1: TOF MS ES+  
 1.73e+006

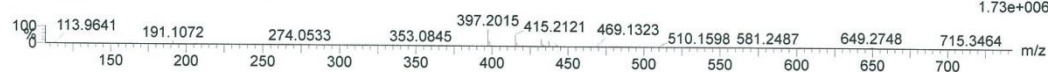

Minimum: -1.5  
 Maximum: 5.0 5.0 50.0

| Mass     | Calc. Mass | mDa | PPM | DBE | i-FIT | Norm | Conf (%) | Formula    |
|----------|------------|-----|-----|-----|-------|------|----------|------------|
| 415.2121 | 415.2121   | 0.0 | 0.0 | 9.5 | 390.1 | n/a  | n/a      | C24 H31 O6 |

Figure S 56. HRESIMS data of **5**

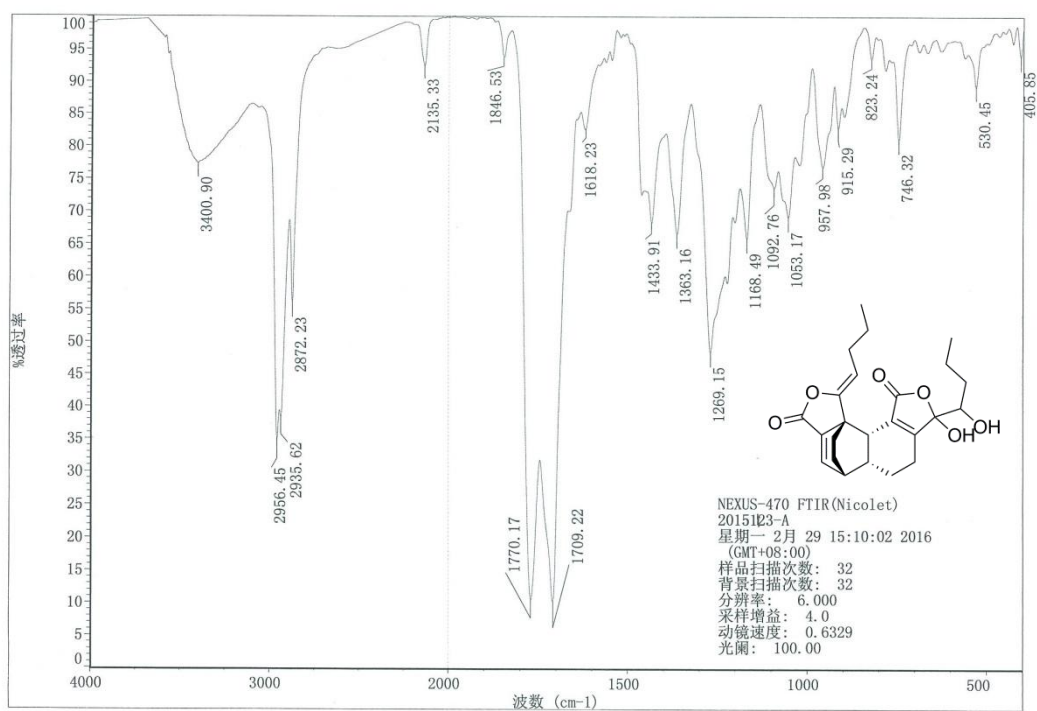

NEXUS-470 FTIR(Nicolet)  
 2015123-A  
 星期一 2月 29 15:10:02 2016  
 (GMT+08:00)  
 样品扫描次数: 32  
 背景扫描次数: 32  
 分辨率: 6.000  
 采样增益: 4.0  
 动镜速度: 0.6329  
 光阑: 100.00

Figure S 57. IR spectrum of **5**



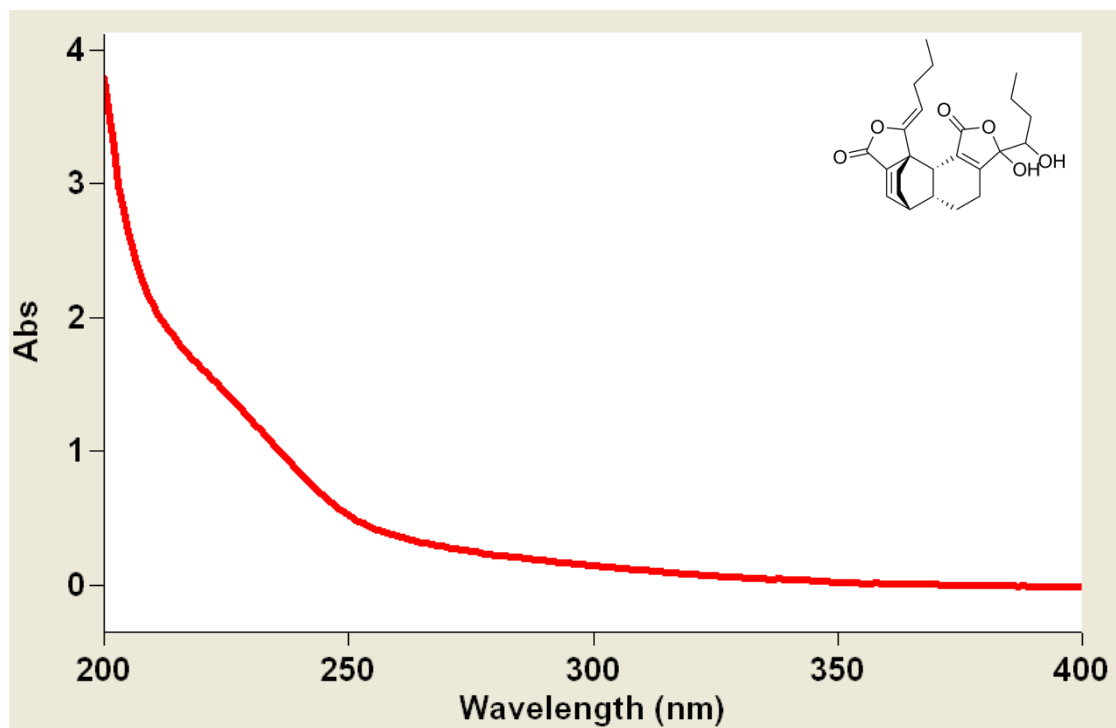

Figure S 58. UV spectrum of **5** in MeOH

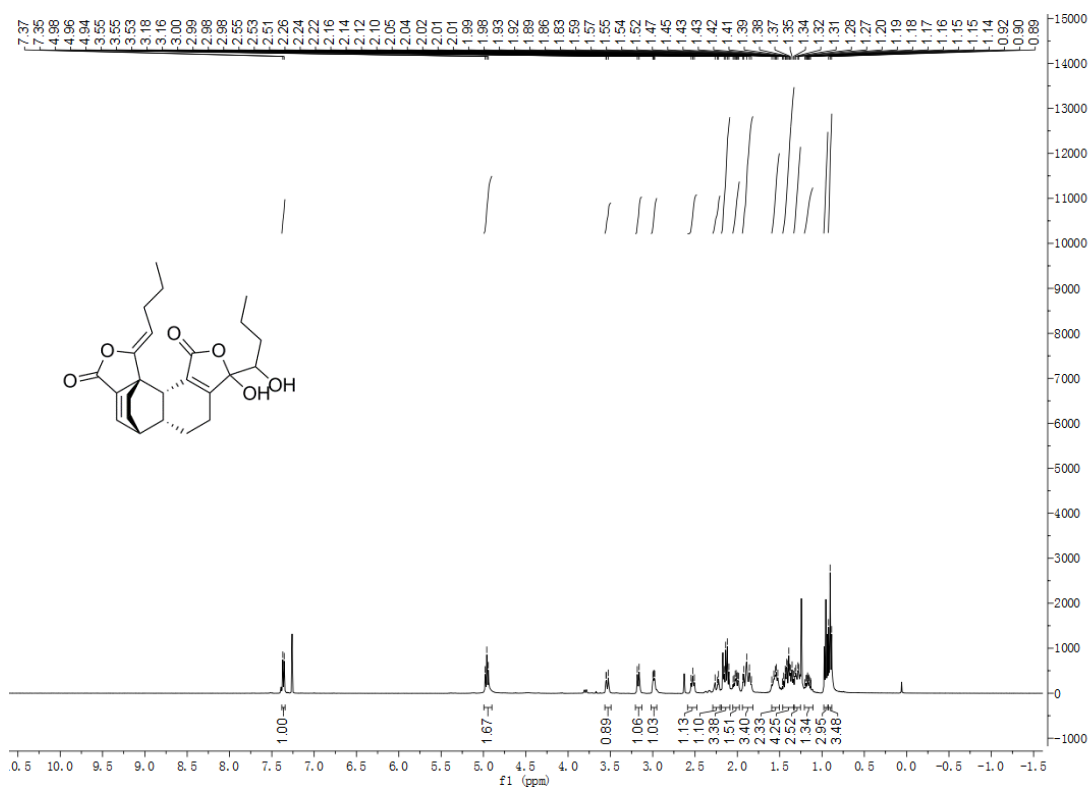

Figure S 59. <sup>1</sup>H NMR spectrum of **5** in CDCl<sub>3</sub>

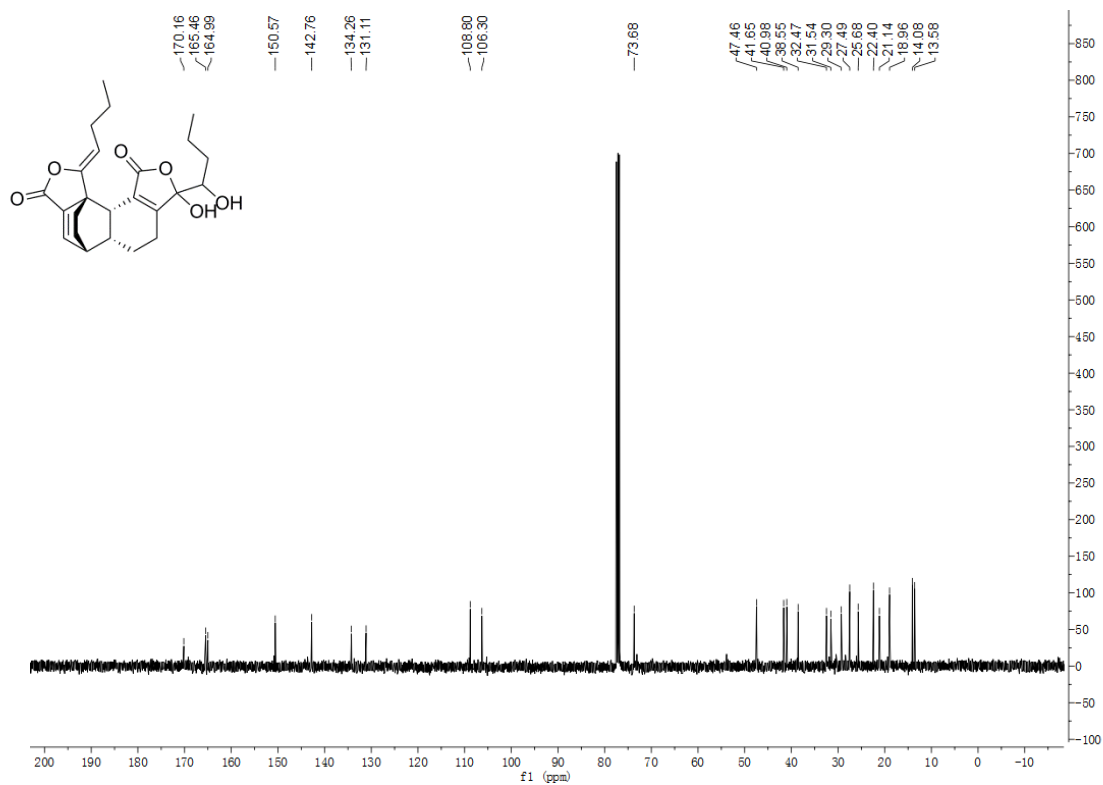

Figure S 60.  $^{13}\text{C}$  NMR spectrum of **5** in CDCl<sub>3</sub>

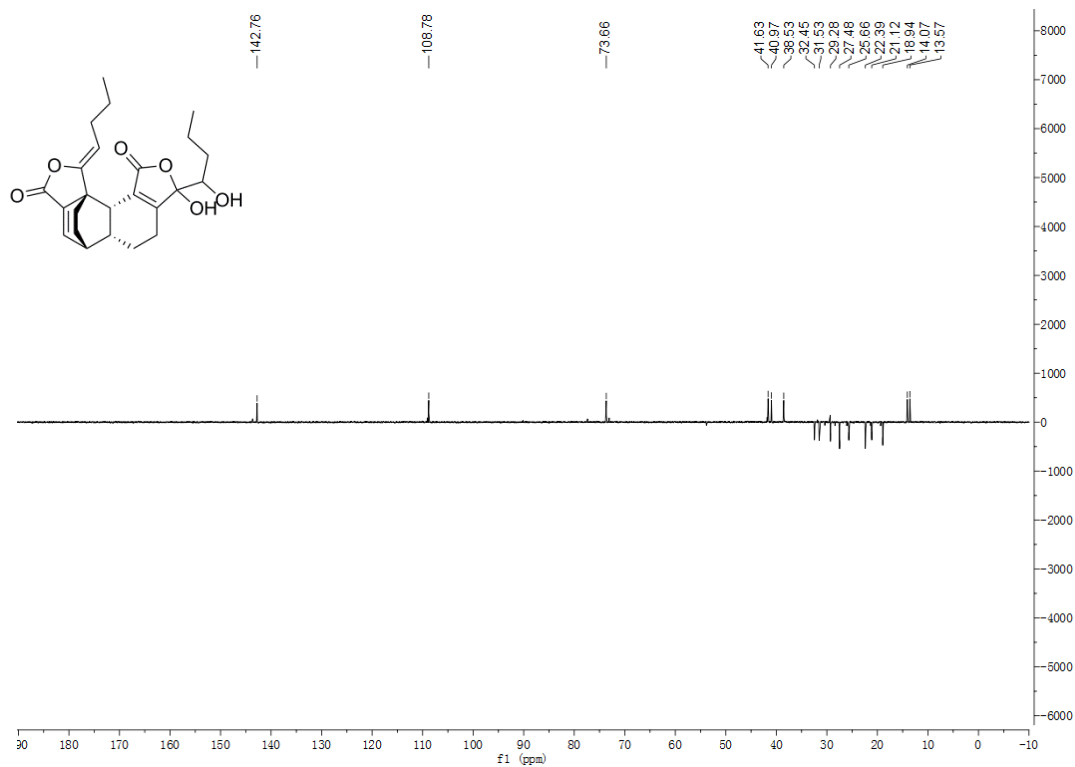

Figure S 61. DEPT spectrum of **5** in CDCl<sub>3</sub>

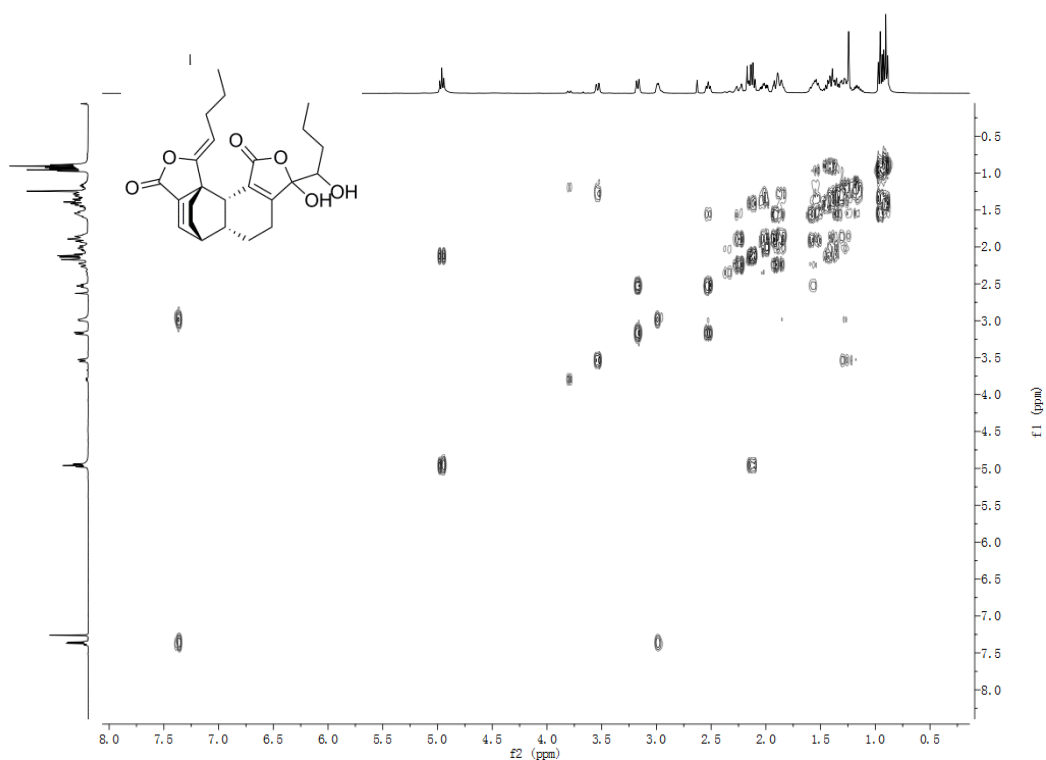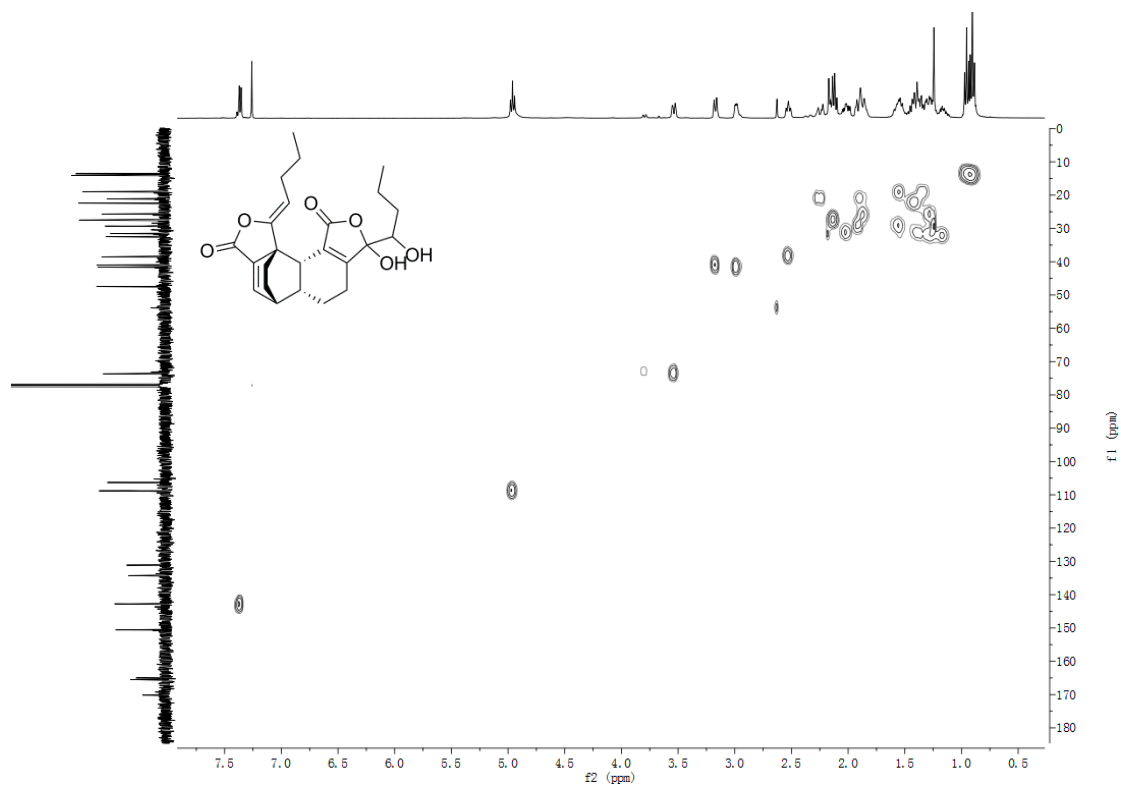

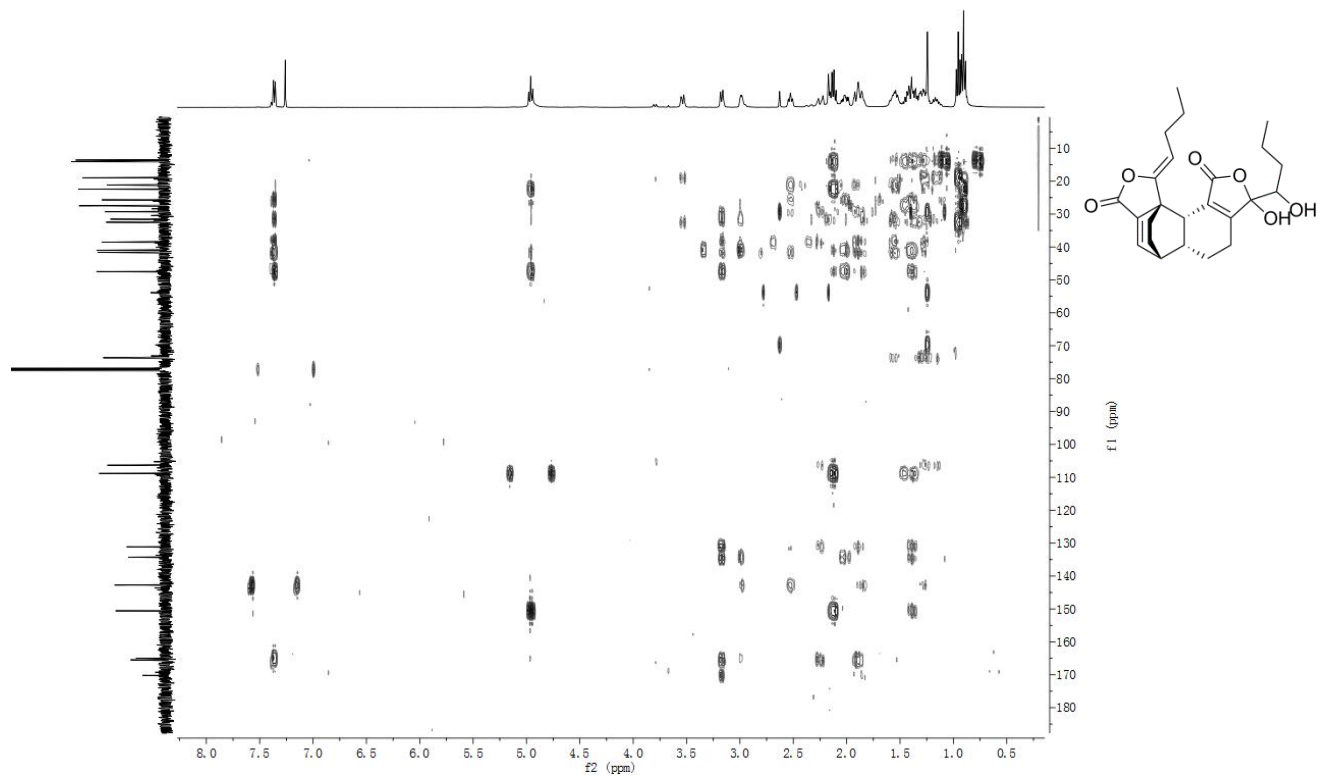

Figure S 64. HMBC spectrum of **5** in CDCl<sub>3</sub>

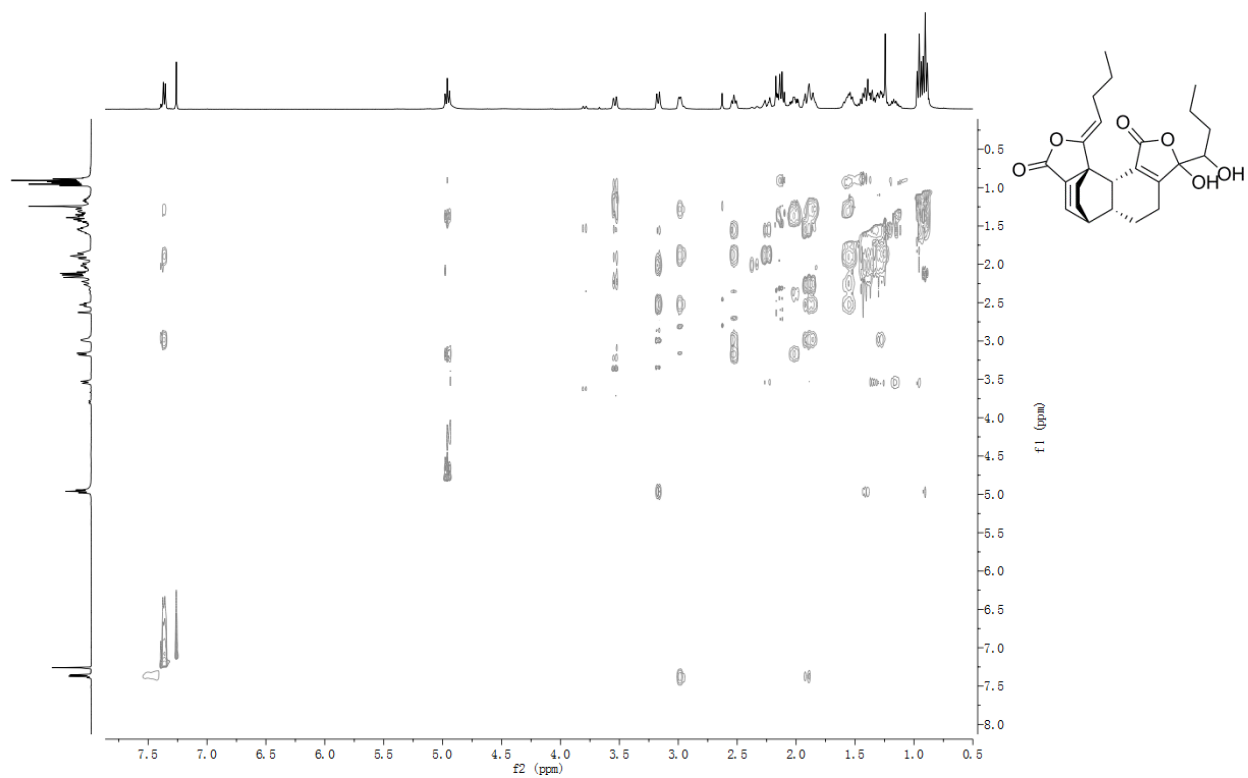

Figure S 65. NOESY spectrum of **5** in CDCl<sub>3</sub>
